# Supplementary material
Source: publisher figshare collection journal article supplement (https://frontiersin.figshare.com/ndownloader/files/12912416)
Supplement: Supplementary file [file 12912416]

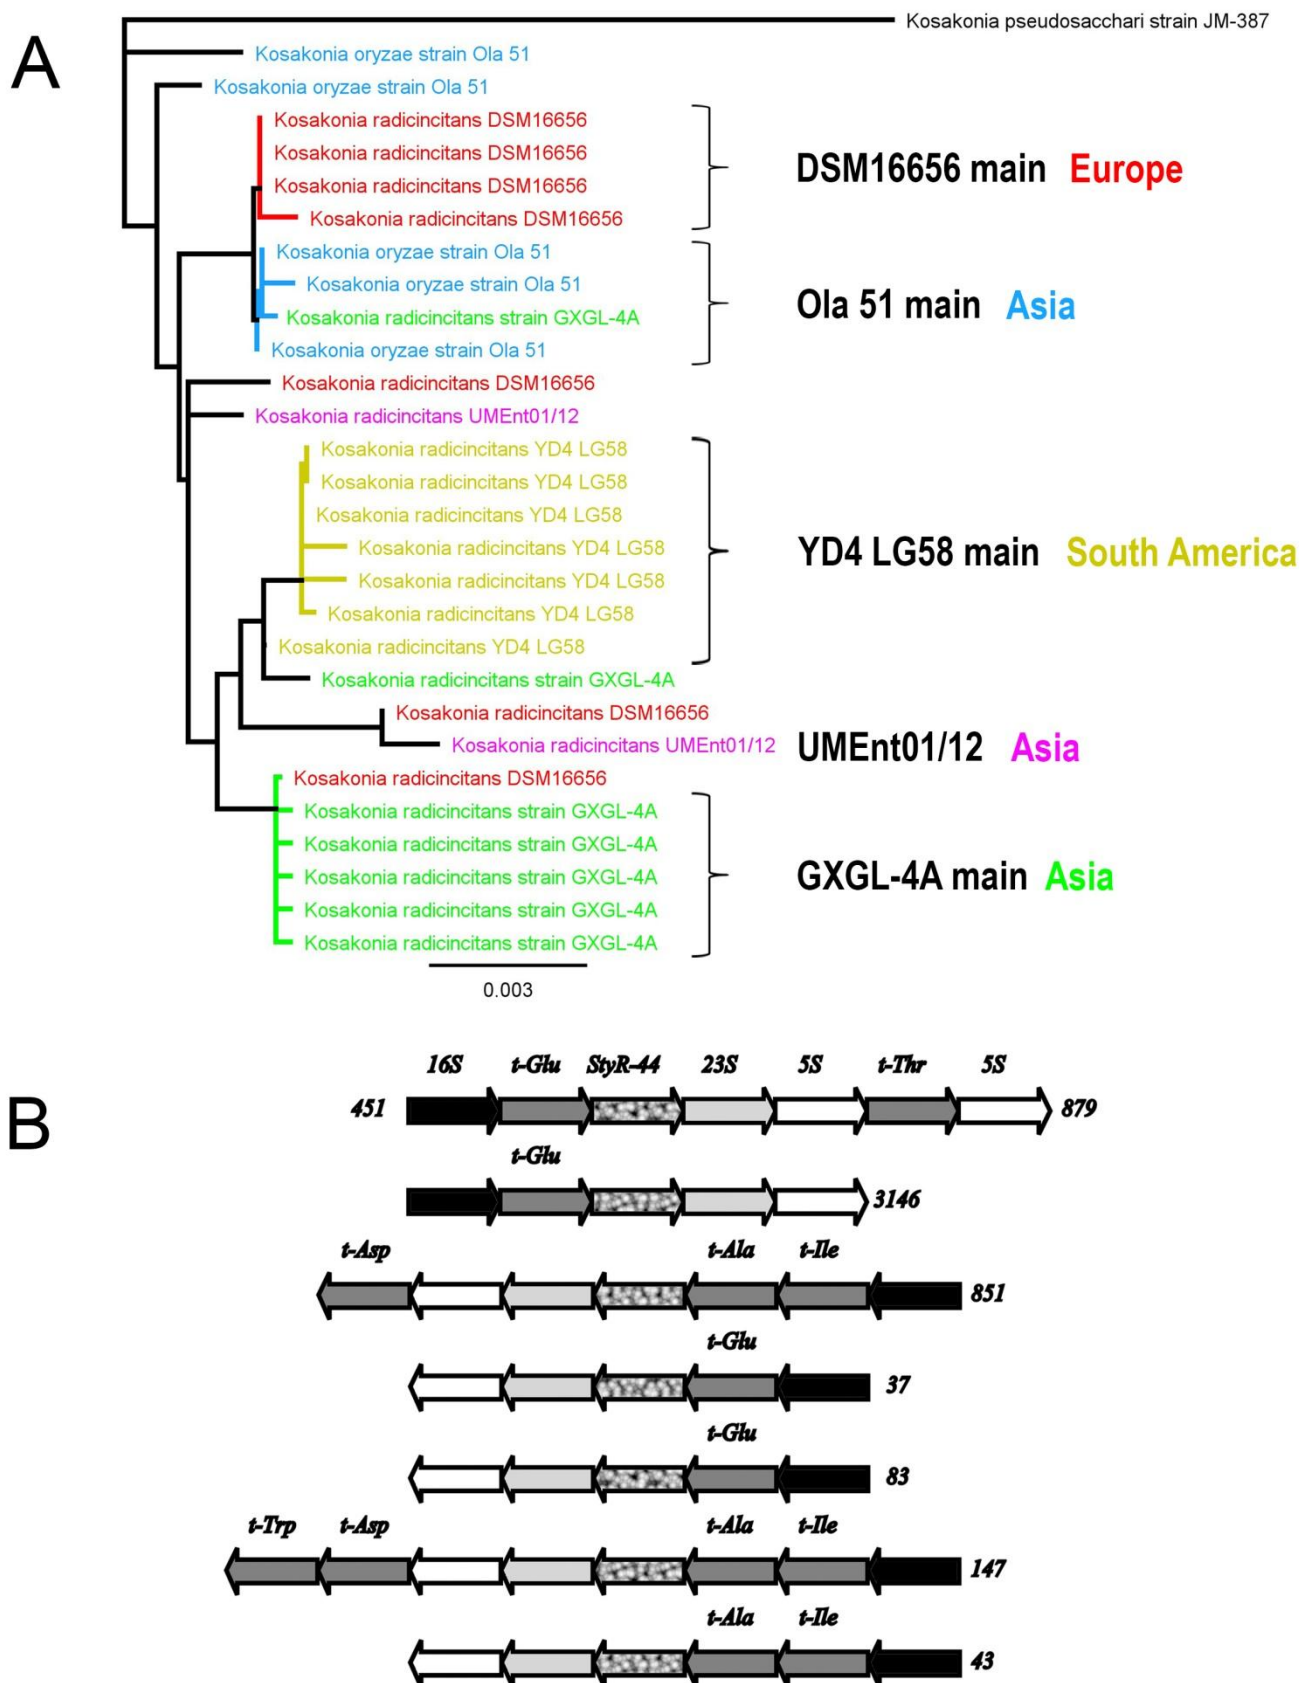

**Fig. S1:** Multiple copies of ribosomal RNA genes in *Kosakonia radicincitans*. **(A)** Phylogeny of multiple 16S rRNA gene copies of five *K. radicincitans* strains. **(B)** Seven rRNA operons of *Kosakonia radicincitans* DSM 16656<sup>T</sup> differing predominantly in absence/presence of inserted tRNA genes.

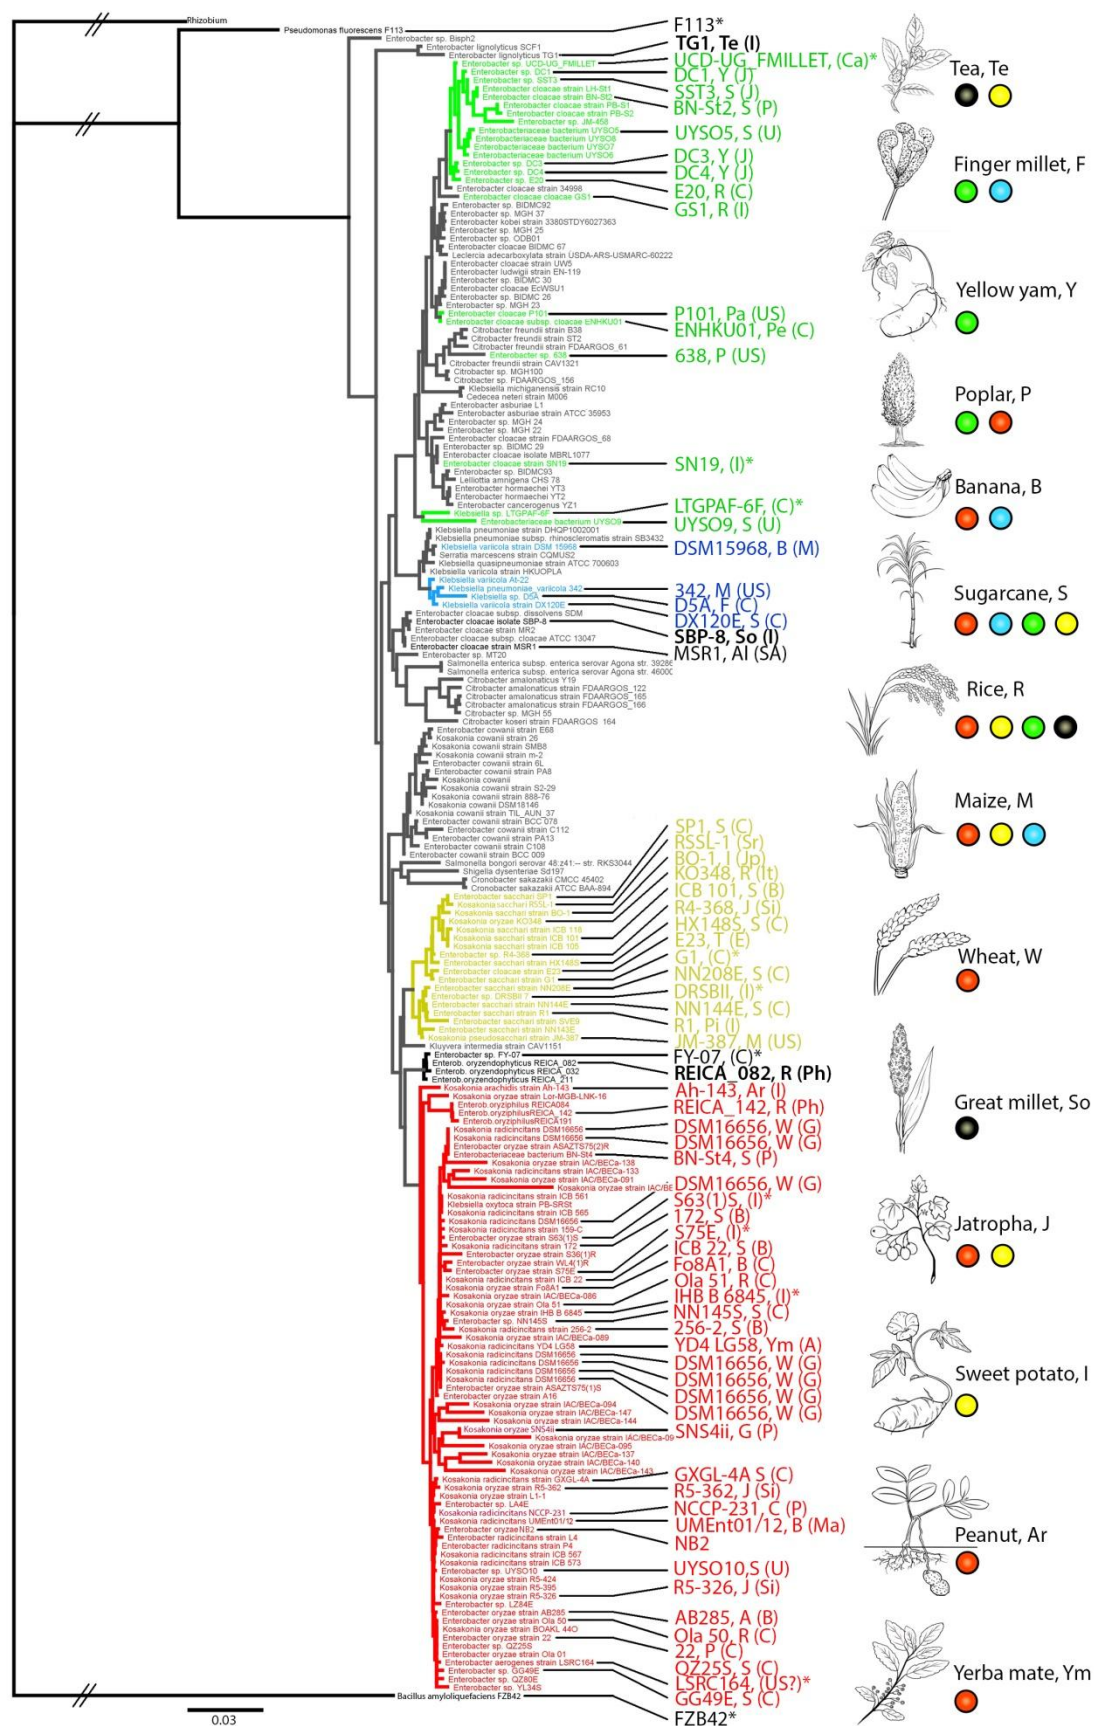

**Fig. S2:** 16S rRNA gene tree of most to date known *Kosakonia* strains and closely related PGP *Enterobacter* and PGP *Klebsiella* strains. Four major groups are considered and depicted in different colors in conformity with **Figure 1**: red = *Kosakonia radicinctans* (KORA) group, yellow = *Kosakonia sacchari* (KOSA) group, green = *Enterobacter* (ENTERO) group, blue = *Klebsiella variicola* (KLEVA) group. Host plants are marked by accordingly colored circles. Strains in bold black letters were found in plants marked by black circles. Capital letters after accessions refer to plant hosts, which are further characterized in **Table S1**. Capital letters in brackets refer to countries given in **Table S1**.

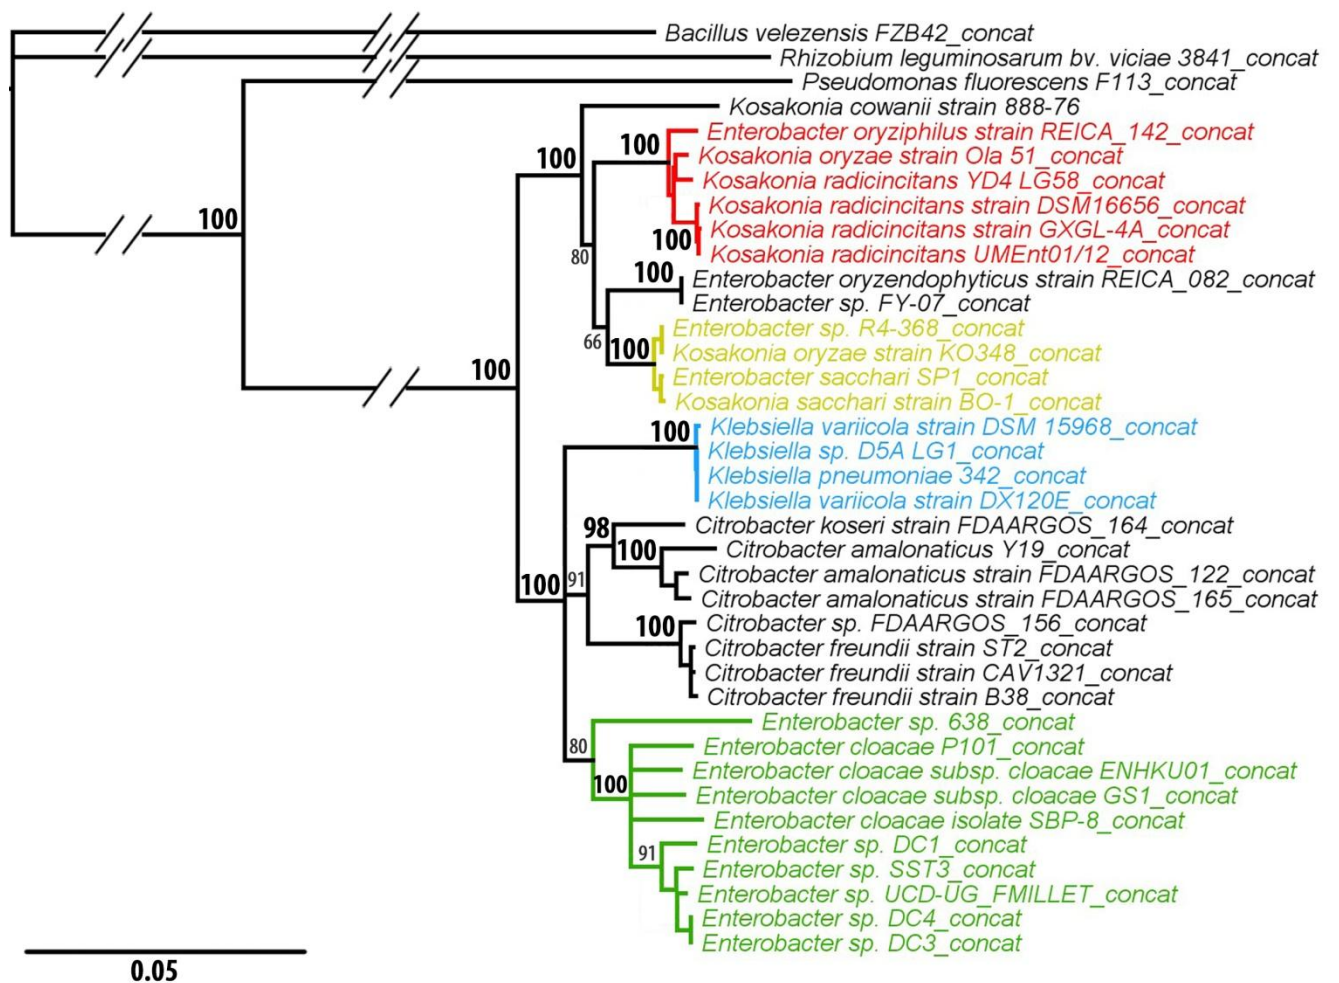

**Fig. S3:** Phylogeny based on concatenated amino acid sequences of housekeeping genes *atpD*, *gyrB*, *infB* and *recA*, considering only taxa with fully sequenced genomes. Bootstrap support is given for a selection of clades only.

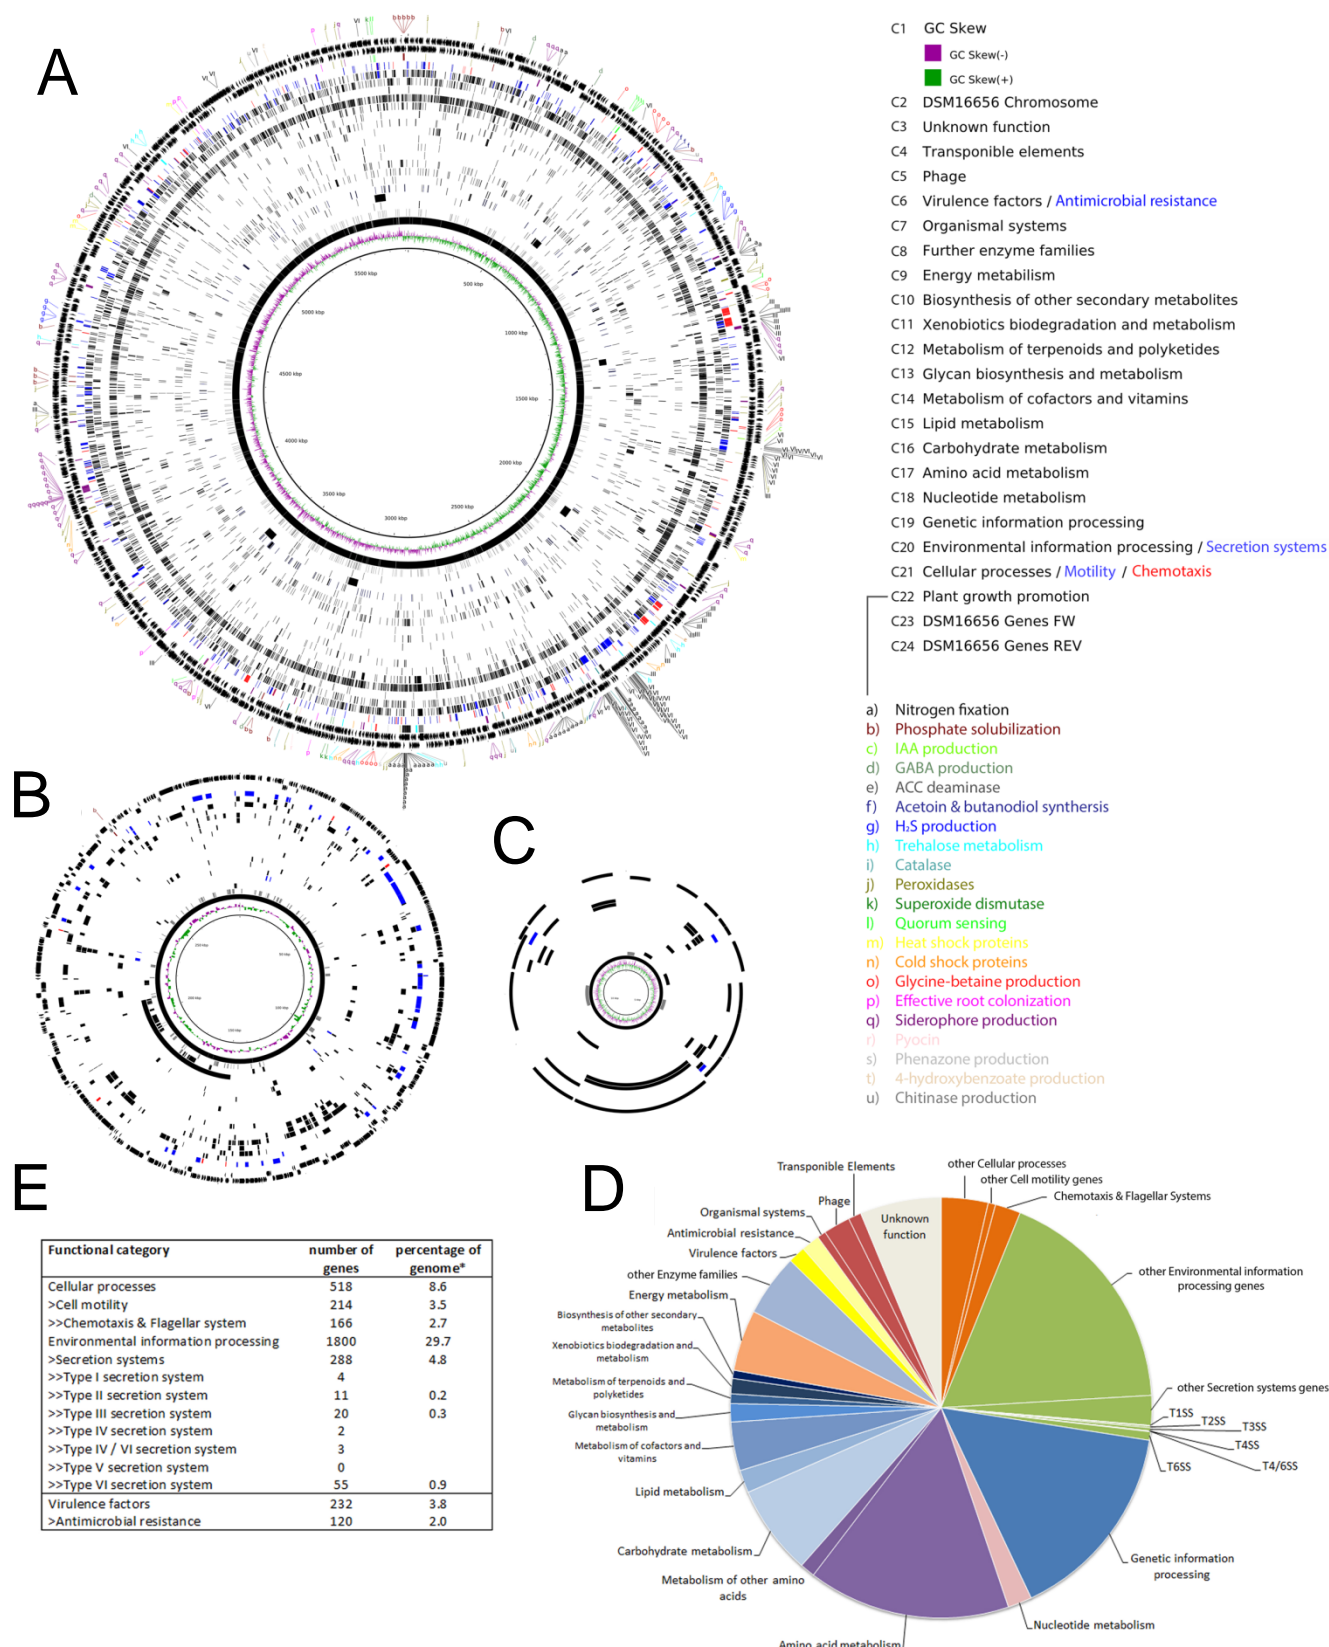

**Fig. S4:** Genome map of *Kosakonia radicincitans* DSM 16656<sup>T</sup> and functional annotation. Circles C4 to C21 represent each a particular biological function; black lines within a circle represent genes. Colored genes depicted in circle C22 are involved in plant growth-promotion (see **Table 1**). The outermost circle of the chromosome map refers to PGP genes from circle C22 and provides information on secretion systems. **(A)** Chromosome, **(B)** Large plasmid, **(C)** Small plasmid. **(D)** and **(E)** Functional classification by BlastKOALA tool from KEGG of all annotated genes of *Kosakonia radicincitans* DSM 16656<sup>T</sup>. **(D)** High-ranking functional categories and a selection of lower-ranking categories. **(E)** A selection of functional categories from **(D)**; \* percentages are given in relation to the total number of genes, not in relation to the number of coding sequences.

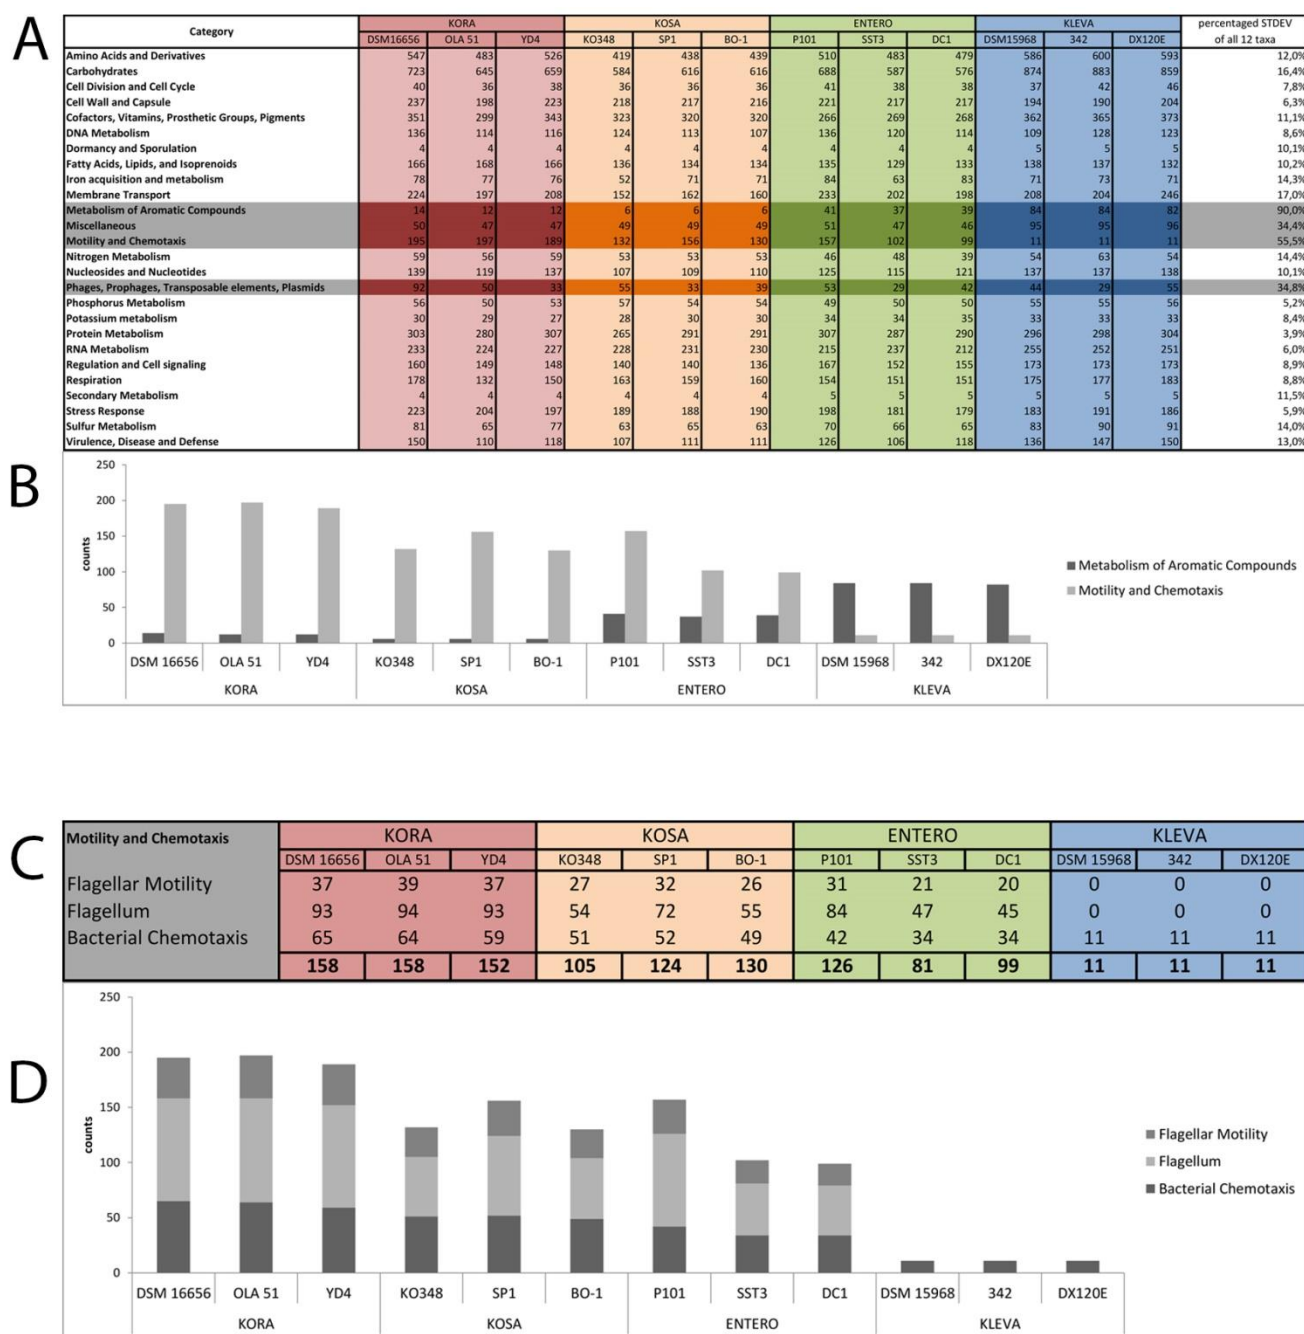

**Fig. S5:** Functional classification of DSM 16656<sup>T</sup>, *Kosakonia radicincitans* (KORA group), *K. sacchari* (KOSA group), *Enterobacter* spp. (ENTERO group) and *Klebsiella variicola* (KLEVA group) by SEED using RAST-annotated genomes. **(A)** Number of genes from all categories assigned by SEED and depicted in **Figure 2**; last column shows the percentage standard deviation in each category considering all 12 taxa: categories with percentage standard deviation above 30% are highlighted; number of genes (= counts) of the two top categories with highest percentage standard deviation ('metabolism of aromatic compounds' and 'motility and chemotaxis') are depicted in **(B)**. **(C)** Number of genes in sub-categories of 'motility and chemotaxis' category; **(D)** bar chart to **(C)**.

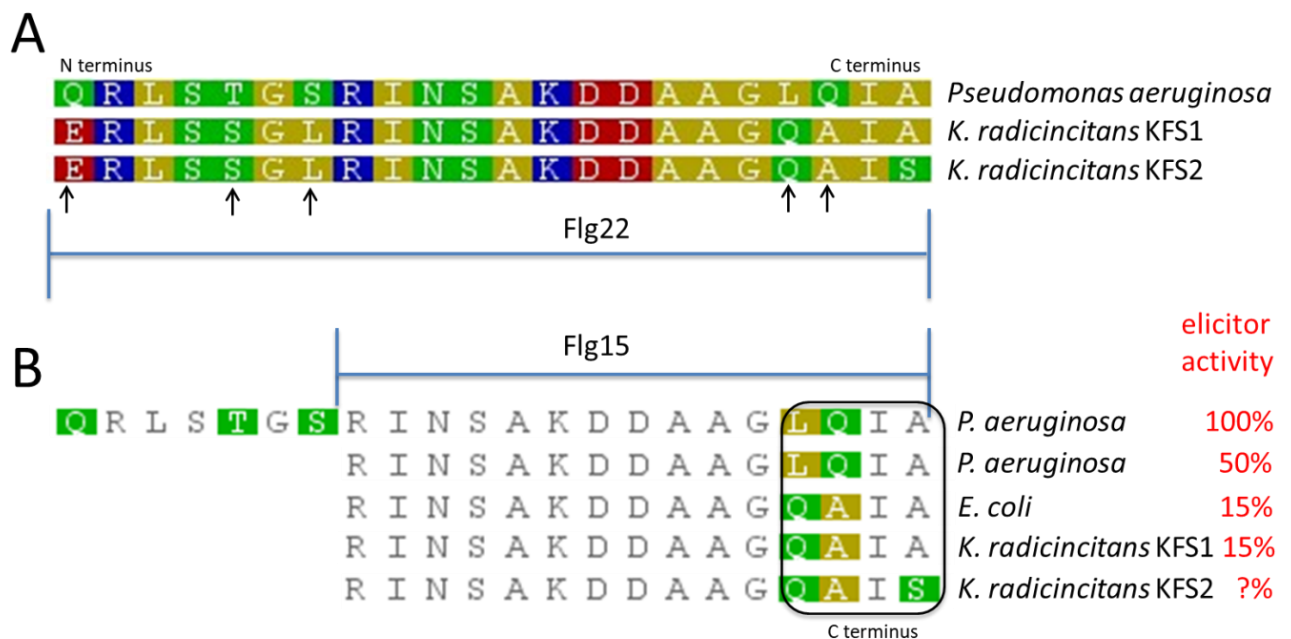

**Fig. S6:** Alignment of Flg22 and Flg15 peptide sequences of flagellins from both flagellar systems of *Kosakonia radicincitans* DSM 16656<sup>T</sup> (encoded by *fliC* of KFS1 and *fliC* of KFS2) to Flg22 and Flg15 sequences of reference strains. **(A)** Polarity of Flg22 amino acids; arrows pointing to AA substitutions between *Pseudomonas aeruginosa* and *K. radicincitans*. **(B)** AA substitutions between *P. aeruginosa*, *E. coli* and *K. radicincitans* at C terminus of Flg15; percentages refer to alkalization response of tomato cells to synthetic Flg22 and Flg15 peptides (= elicitor activity or PTI potential) according to Meindl et al. 2000.

## Reference

Meindl T, Boller T & Felix G (2000) The Bacterial Elicitor Flagellin Activates Its Receptor in Tomato Cells According to the Address–Message Concept. *The Plant Cell* **12**: 1783-1794.

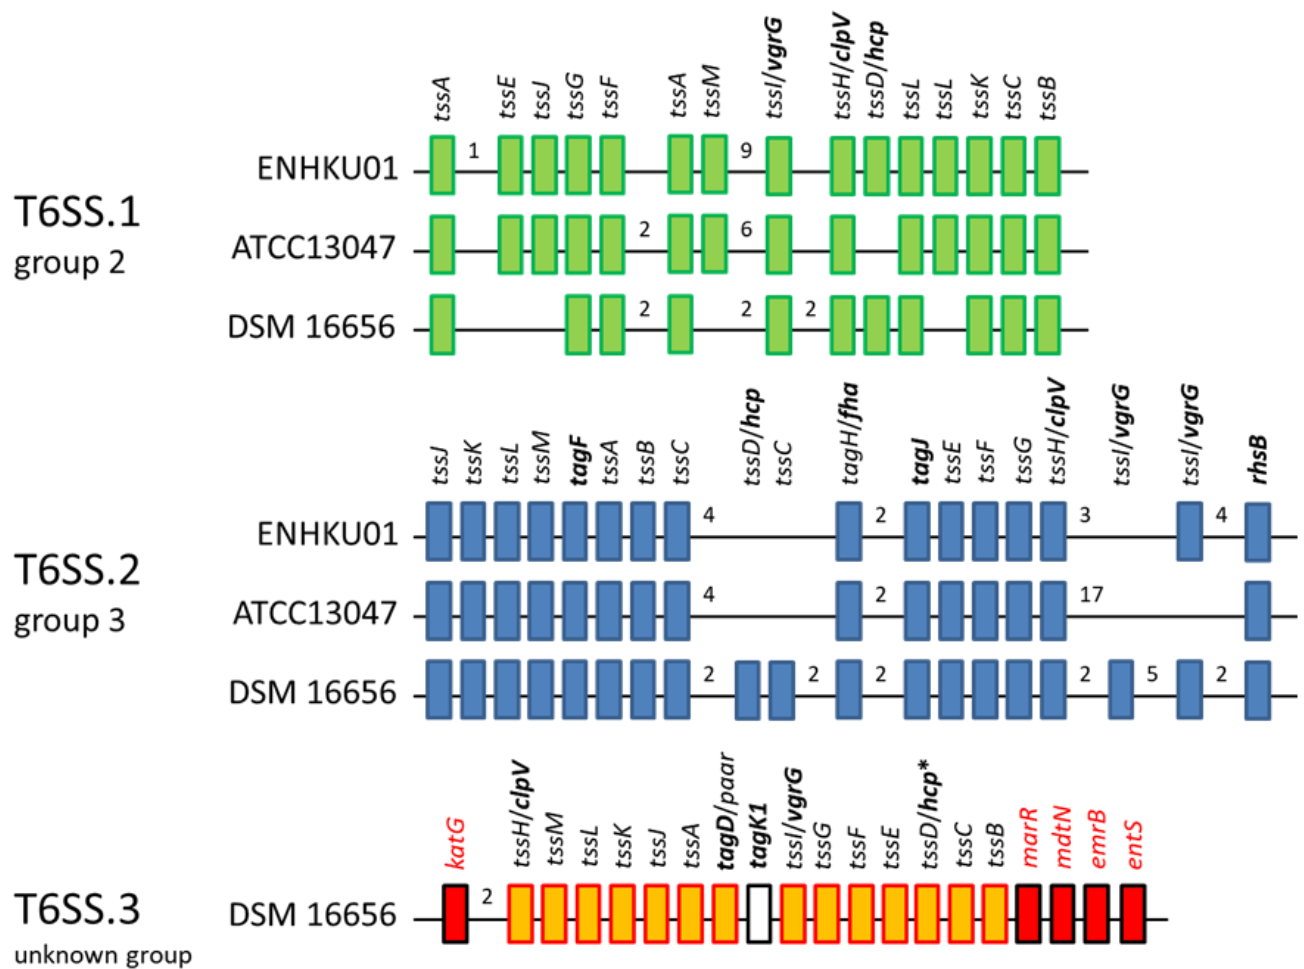

**Fig. S7:** Gene cluster composition of the three T6SSs of *Kosakonia radicincitans* DSM 16656<sup>T</sup> in comparison to two closely related *Enterobacter cloacae* strains. The *E. cloacae* strains exhibit the two T6SS clusters commonly found in *Enterobacter*; strain ENH KU01 is a plant growth-promoting endophyte and is included in the comparative genome analyses (**Figures 4 and 5**). T6SS composition of *Enterobacter* and the style of presentation was adapted from (Liu et al. 2013b), but simplified regarding variable regions; numbers refer to genes not belonging to *tss* or *tag* genes. Group 2 and group 3 refer to T6SS clusters found in plant-associated bacteria (reviewed in Bernal et al. (2018)); *paar* = gene encoding an Zn-binding Pro-Ala-Ala-Arg (PAAR) domain-containing protein; *tagK1* = *Kosakonia*-specific T6SS.3 accessory gene of unknown function; *hcp\** = gene of Hcp1-like superfamily (IPR036624) identified by Interpro. Genes shown in red are from the genomic environment of T6SS.3 of *K. radicincitans* DSM 16656<sup>T</sup>.

## References

- Bernal P, Llamas MA & Filloux A (2018) Type VI secretion systems in plant-associated bacteria. *Environ Microbiol* **20**: 1-15.
- Liu WY, Wong CF, Chung KM, Jiang JW & Leung FC (2013) Comparative genome analysis of *Enterobacter cloacae*. *PLoS One* **8**: e74487.

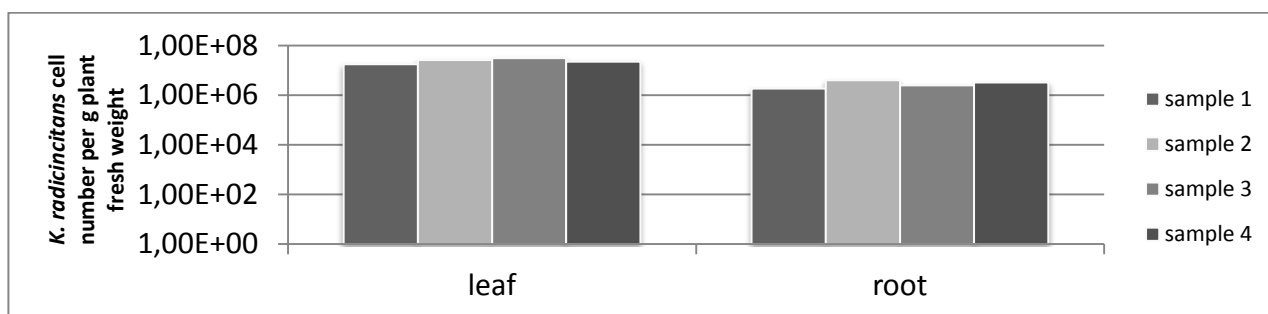

**Fig. S8:** Colonization of tomato leaf and root tissue by *Kosakonia radicincitans* DSM 16656<sup>T</sup> determined by qPCR using the target gene calibration curve.

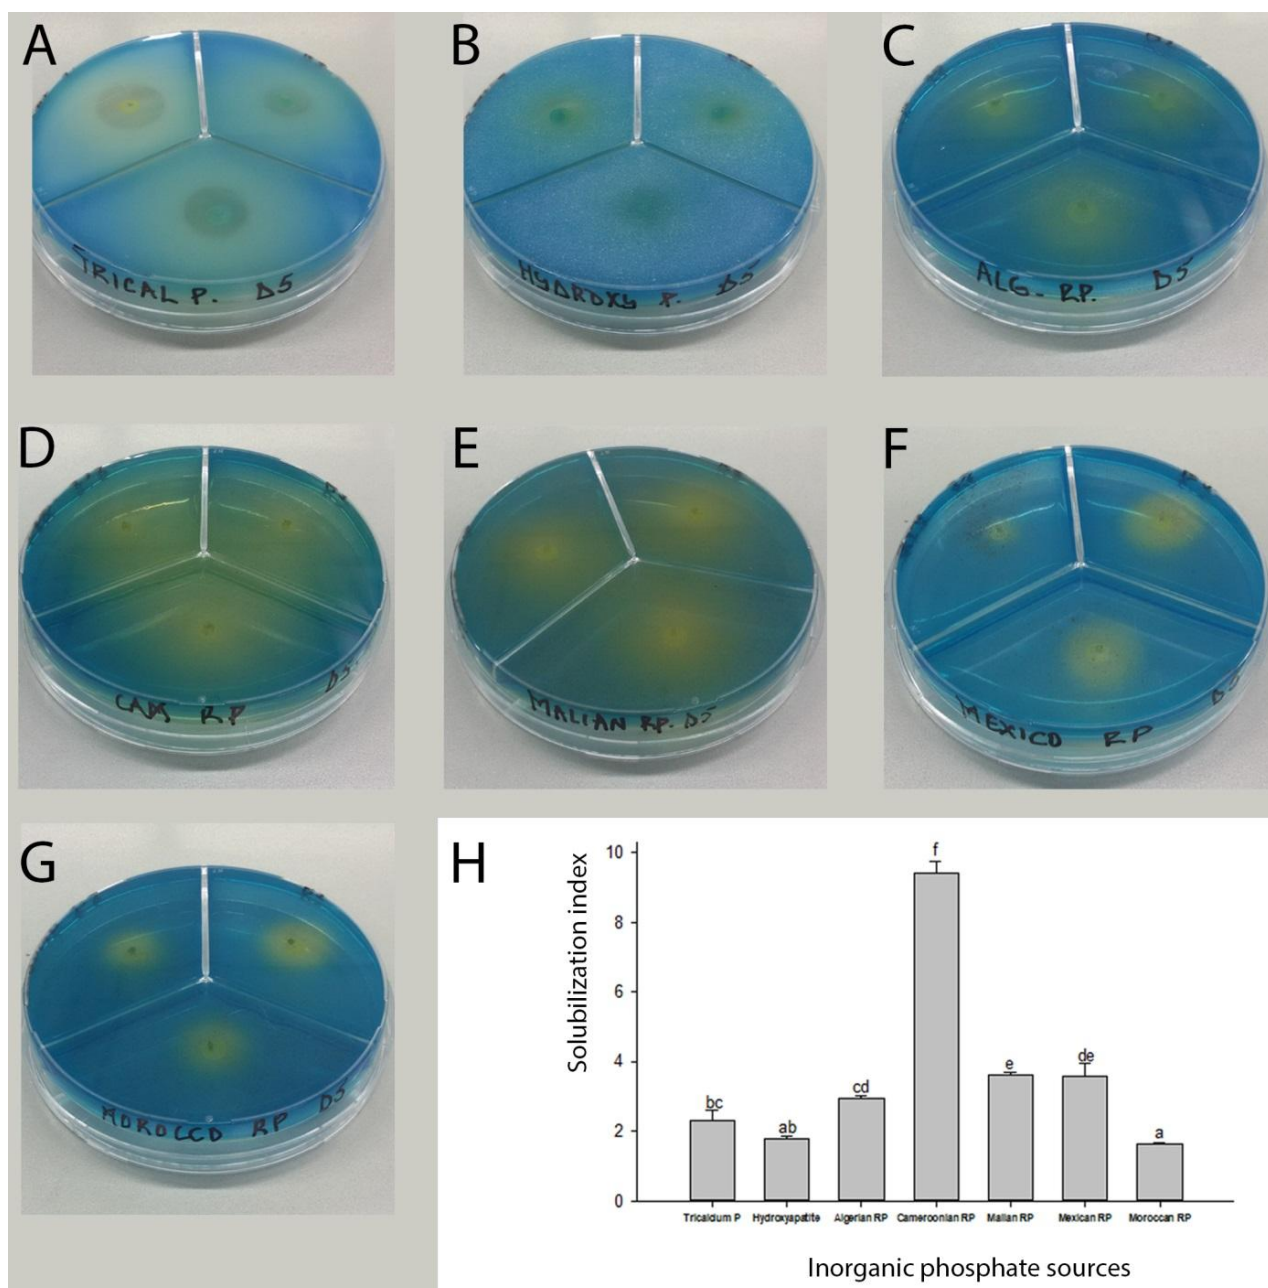

**Fig. S9:** Ability of *K. radicincitans* DSM 16656<sup>T</sup> to solubilize inorganic phosphate sources: (A) Tricalcium phosphate, (B) Hydroxyapatite, and (C)-(G) Rock phosphate (RP) from different origins: (C) Algerian RP, (D) Cameroonian RP, (E) Malian RP, (F) Mexican RP and (G) Moroccan RP on NBRIP agar plates. (H) Solubilizing index; order of phosphate sources corresponds to order of petri dishes shown in (A)-(G); lower case letters above bars indicate significant differences in phosphate solubilization activity ( $p < 0.05$ ) using Tukey test.

**Tab. S1:** Basic information about *Kosakonia* spp. and closely related strains of other genera, including hosts, sampling sites and references

| Taxon                   | Strain                                                      | NCBI accession                                                                   | 16S rRNA gene sequence identity to DSM 16656 <sup>T</sup> | Host/ place of origin                                       | Sampling site                                                      | Reference                |
|-------------------------|-------------------------------------------------------------|----------------------------------------------------------------------------------|-----------------------------------------------------------|-------------------------------------------------------------|--------------------------------------------------------------------|--------------------------|
| <i>K. radicincitans</i> | DSM 16656 <sup>T</sup>                                      | CP018016                                                                         | 99.8-100%                                                 | Wheat, W<br><i>Triticum aestivum</i><br>phyllosphere        | Germany (G)                                                        | (1)                      |
| <i>K. radicincitans</i> | GXGL-4A                                                     | NZ_CP015113                                                                      | 99.9%                                                     | Maize, M<br><i>Zeamays</i><br>root surface                  | China (C)<br>Guangxi                                               | (2)                      |
| <i>K. radicincitans</i> | YD4                                                         | JSFC01000001                                                                     | 99.9%                                                     | Yerba mate, Ym<br>rhizosphere                               | Argentina (A)                                                      | (3)                      |
| <i>K. oryzae</i>        | Ola 51 <sup>T</sup><br>Ola 50<br>Ola 01                     | NR_116033<br>EF488758<br>EF488760                                                | 99.9%<br>99.9%<br>99.8%                                   | Wild rice, R<br><i>Oryza latifolia</i> ,<br>roots           | China (C)<br>Guangzhou                                             | (4)                      |
| 'Endophytic bacterium'  | Y01                                                         | FJ205690                                                                         | 99.9%                                                     | Cotton, Co<br><i>Gossypium arboreum</i><br>roots            | China (C)<br>Nanjing                                               | (5)                      |
| <i>K. oryzae</i>        | 22                                                          | KC843380                                                                         | 99.9%                                                     | desert poplar, P<br><i>Populus euphratica</i>               | China (C)<br>Tarim Basin<br>Ugan River                             | Unpublished              |
| <i>K. radicincitans</i> | ICB22                                                       | HQ413268                                                                         | 99.9%<br>91.0% coverage                                   | Sugarcane, S<br><i>Saccharum officinarum</i><br>stem        | Brazil (B)                                                         | Unpublished              |
| <i>K. oryzae</i>        | SNS4ii                                                      | AB975359                                                                         | 99.9%<br>93.9% coverage                                   | Soybean, G<br><i>Glycine max</i><br>root nodules            | Pakistan (P)                                                       | Unpublished,<br>AB975359 |
| <i>K. radicincitans</i> | UMEnt01/12                                                  | NZ_JDY01000000                                                                   | 99.8%                                                     | Banana, B<br><i>Musa sp.</i>                                | Malaysia (Ma)                                                      | (6)                      |
| <i>K. oryzae</i>        | D4                                                          | LT799040                                                                         | 99.8%                                                     | Not applicable                                              | USA (US)?                                                          | Unpublished              |
| <i>E. sp.</i>           | BN-St4<br>PB-SRSt                                           | GU459203<br>GU459212                                                             | 99.8%<br>99.6%                                            | Sugarcane, S<br><i>Saccharum officinarum</i><br>rhizosphere | Pakistan (P)<br>Punjab<br>Province                                 | (7)                      |
| <i>K. oryzae</i>        | AB285                                                       | HQ706110                                                                         | 99.8%<br>98.3% coverage                                   | Pineapple, A<br><i>Ananas comosus</i>                       | Brazil (B)<br>Fortaleza                                            | (8)                      |
| <i>K. radicincitans</i> | ICB561<br>ICB565<br>ICB 567<br>ICB 573                      | HM013845<br>HM748090<br>HM748091<br>HQ700329                                     | 99.8%<br>91.3-91.6%<br>coverage                           | Sugarcane, S<br><i>Saccharum officinarum</i>                | Brazil (B)                                                         | Unpublished              |
| <i>E. sp.</i>           | R5-326<br>R5-395<br>R5-424<br>L1-1                          | JQ659728<br>JQ659764<br>JQ659772<br>JQ659304                                     | 99.8%<br>99.7%<br>99.7%<br>99.7%                          | Purging nut, J<br><i>Jatropha curcas</i>                    | Singapore (Si)<br>accessions from<br>Indonesia, China<br>and India | (9)                      |
| <i>K. radicincitans</i> | 159-C<br>172                                                | KP974657<br>KP993224                                                             | 99.7%<br>99.7% coverage                                   | Sugarcane, S<br><i>Saccharum officinarum</i><br>roots       | Northeast Brazil<br>(B)                                            | Unpublished              |
| <i>E. sp.</i>           | NN145S<br>YL34S<br>LA4E<br>GG49E<br>QZ80E<br>LZ84E<br>QZ25S | HQ204285<br>HQ204291<br>HQ204310<br>HQ204300<br>HQ204317<br>HQ204307<br>HQ204288 | 99.5-99.7%<br>98.2% coverage                              | Sugarcane, S<br><i>Saccharum officinarum</i><br>rhizosphere | China (C)<br>Guangxi                                               | (10)<br>(11)             |
| <i>K. arachidis</i>     | AW3                                                         | AB975353                                                                         | 99.7%<br>45.8% coverage                                   | Wheat, W<br><i>Triticum aestivum</i><br>soil                | Pakistan (P)<br>Rawalpindi                                         | Unpublished              |
| <i>K. oryzae</i>        | WL4(1)R<br>S75E<br>S36(1)R<br>S63(1)S                       | JF513182<br>JF513181<br>JF513180<br>JF513177                                     | 98.9-99.6%<br>97.2-99.5%<br>coverage                      | Salt affected soil                                          | India (I)<br>Karnataka                                             | Unpublished              |
| <i>E. sp.</i>           | UYSO10                                                      | JF262582                                                                         | 99.6%                                                     | Sugarcane, S<br><i>Saccharum officinarum</i>                | Uruguay (U)                                                        | (12)                     |
| <i>K. oryzae</i>        | IHB B 6845                                                  | KF668469                                                                         | 99.6%<br>98.4% coverage                                   | Agarwood<br><i>Aquilaria agallocha</i><br>tree core         | India (I)<br>Palampu<br>r                                          | Unpublished              |
| <i>E. sp.</i>           | NCCP-231                                                    | AB610883                                                                         | 99.6%<br>95.7% coverage                                   | Chickpea, C<br><i>Cicer arietinum</i><br>root nodules       | Pakistan (P)<br>Attock                                             | Unpublished              |

|                            |                                      |                                              |                         |                                                                |                                |             |
|----------------------------|--------------------------------------|----------------------------------------------|-------------------------|----------------------------------------------------------------|--------------------------------|-------------|
| <i>K. oryzae</i>           | NB2                                  | JX088114                                     | 99.6%<br>93.6%coverage  | Tomato<br><i>Solanum lycopersicum</i><br>rhizosphere soil      | India (I)<br>Bangalore         | Unpublished |
| <i>Kl. aerogenes</i>       | LSRC164                              | JF772083                                     | 99.6%                   | fruit fly<br><i>Bactrocera dorsalis</i><br>(insect)            | China (C)?                     | Unpublished |
| <i>K. radicincitans</i>    | 256-2                                | KP974660                                     | 99.5%<br>99.1%coverage  | Sugarcane, S<br><i>Saccharum officinarum</i><br>shoots         | Northeast Brazil<br>(B)        | Unpublished |
| <i>K. oryzae</i>           | Fo8A1                                | KJ605844                                     | 99.5%<br>94.3%coverage  | Banana, B<br><i>Musasp.</i><br>Surface sterilized root         | Taiwan,<br>China (C)           | (13)        |
| <i>K. oryzae</i>           | IAC/BECa-086                         | KJ670091                                     | 99.1%                   | Sugarcane, S<br><i>Saccharum officinarum</i><br>roots and stem | Brazil (B)                     | (14, 15)    |
| <i>K. oryzae</i>           | Lor-MGB-LNK-16                       | KC754746                                     | 99.1%                   | rice water weevil<br>(insect)                                  | USA (US)                       | Unpublished |
| <i>K. arachidis</i>        | Ah-143 <sup>T</sup>                  | NR_116403                                    | 98.8%                   | Groundnut, Ar<br><i>Arachis hypogaea</i>                       | India (I)<br>Coimbatore        | (16)        |
| <i>K. oryziphilus</i>      | REICA_142<br>REICA_191<br>REICA_084  | JF795013<br>JF795014<br>JF795012             | 98.6%<br>98.6%<br>98.2% | Rice, R<br><i>Oryza sativa</i><br>root endosphere              | Philippines (Ph)<br>Los Baños  | (17)        |
| <i>E. sp.</i>              | FY-07                                | NZ_CP012487                                  | 98.6%                   | Oil field                                                      | China (C)<br>Jilin             | (18)        |
| <i>E. oryzendophyticus</i> | REICA_211<br>REICA_082<br>REICA_032  | JF795015<br>JF795011<br>JF795010             | 98.5%<br>98.4%<br>98.3% | Rice, R<br><i>Oryza sativa</i>                                 | Philippines (Ph)<br>Los Baños, | (19)        |
| <i>E. lignolyticus</i>     | D5                                   | CP012871                                     | 98.0%                   | Soil                                                           | Malaysia (Ma)                  | Unpublished |
| <i>E. lignolyticus</i>     | TG1=JD-TRS-7                         | KJ767522                                     | 96.9%                   | Tea, Te<br><i>Camelia sinensis</i><br>rhizosphere soil         | India (I)<br>Assam             | (20)        |
| <i>E. sp.</i>              | DRSBII7<br>DRSBII10                  | JF514549<br>JF514550                         | 98.5%                   | Tropical sundew<br><i>Drosera burmanii</i>                     | India (I)                      | Unpublished |
| <i>E. cloacae</i>          | E23                                  | HM585374                                     | 98.5%<br>98.3%coverage  | Tomato<br><i>Solanum lycopersicum</i><br>fruit                 | Egypt                          | Unpublished |
| <i>K. sacchari</i>         | R1                                   | KF953912                                     | 98.4%<br>88.2%coverage  | Pigeon pea, Pi<br><i>Cajanus cajan</i><br>root nodule          | India (I)<br>Surat             | Unpublished |
| <i>K. sacchari</i>         | SP1 <sup>T</sup>                     | NR_118333                                    | 98.4%                   | Sugarcane, S<br><i>Saccharum officinarum</i>                   | China (C)<br>Guangxi           | (10)        |
| <i>K. sacchari</i>         | G1                                   | KJ567004                                     | 98.4%                   | Tea tree<br><i>Melaleuca?</i>                                  | China (C)<br>Fuzhou            | Unpublished |
| <i>E. sp.</i>              | R4-368                               | NC_021500                                    | 98.4%                   | Purging nut, J<br><i>Jatropha curcas</i><br>root               | Singapore (Si)                 | (9)         |
| <i>K. oryzae</i>           | KO348                                | JZLI01000045                                 | 98.3%                   | Rice, R<br><i>Oryza sativa</i><br>root                         | Italia (It)                    | (21)        |
| <i>K. sacchari</i>         | BO-1                                 | NZ_CP016337                                  | 98.2%                   | Sweet potato, I<br><i>Ipomoea batatas</i>                      | Japan (Jp)                     | (22)        |
| <i>E. sp.</i>              | NN145S<br>NN208E                     | HQ204285<br>HQ204314                         | 98.5%<br>98.2%coverage  | Sugarcane, S<br><i>Saccharum officinarum</i><br>rhizosphere    | China (C)<br>Guangxi           | (11)        |
| <i>K. sacchari</i>         | HX148S<br>NN143E<br>NN144E<br>NN208E | HQ204281<br>HQ204313<br>HQ204314<br>HQ204315 | 98.1%                   | Sugarcane, S<br><i>Saccharum officinarum</i>                   | China (C)<br>Guangxi           | (11)        |
| <i>K. sacchari</i>         | ICB101<br>ICB105<br>ICB118           | HQ413269<br>HQ413270<br>HM748048             | 97.8-98.1%              | Sugarcane, S<br><i>Saccharum officinarum</i>                   | Brazil (B)                     | Unpublished |
| <i>K. pseudosacchari</i>   | JM-387                               | NR_135211                                    | 98.0%                   | Maize, M<br>root                                               | USA (US)<br>Tallassee          | (23)        |
| <i>K. sacchari</i>         | SVE9                                 | KF906843                                     | 97.8%                   | Bristlegrass<br><i>Setaria verticillata</i>                    | India (I)                      | Unpublished |

|                            |                                             |                                              |                                  |                                                                                              |                                    |             |
|----------------------------|---------------------------------------------|----------------------------------------------|----------------------------------|----------------------------------------------------------------------------------------------|------------------------------------|-------------|
| <i>K. sacchari</i>         | RSSL                                        | Not available                                | 97.7%                            | Rice field soil                                                                              | Sri Lanka (SL)                     | Unpublished |
| <i>K. sp.</i>              | S29                                         | KX893413                                     | 97.5%                            | Oil palm<br><i>Elaeis sp.</i><br>leaves                                                      | Singapore (Si)                     | Unpublished |
| <i>K. cowanii</i>          | BCC009                                      | EU629164<br>(24) BCC078                      | <97.5% with                      | <i>Eucalyptus</i><br>98.5% coverage                                                          | Uruguay (U)                        |             |
| <i>Kl. variicola</i>       | DX120E                                      | CP009274                                     | 97.9%                            | Sugarcane, S<br><i>Saccharum officinarum</i>                                                 | China (C)<br>Guangxi               | (25, 26)    |
| <i>Kl. variicola</i>       | DSM15968 <sup>1</sup><br>=F2R9 <sup>1</sup> | CP010523                                     | 97.9%                            | Banana, B<br><i>Musa sp.</i>                                                                 | Mexico (M)<br>Colima<br>(28) roots | (27)        |
| <i>Kl. variicola</i>       | 342                                         | CP000964                                     | 97.7%                            | Maize, M<br><i>Zea mays</i><br>stems                                                         | USA (US)<br>Wisconsin-<br>Madison  | (29)        |
| <i>Kl. sp.</i>             | D5A                                         | JQ277465                                     | 96.8%                            | Tall fescue, F<br><i>Festuca arundinacea</i><br>rhizosphere soil                             | China (C)<br>Shandong              | (30)        |
| <i>Kl. sp.</i>             | SBP-8                                       | CP016906                                     | 97.9%                            | Great Millet, So<br><i>Sorghum bicolor</i> ,<br>rhizosphere                                  | India (I)<br>Rajasthan             | (31)        |
| <i>E. cloacae</i>          | MSR1                                        | KJ668861                                     | 97.6%                            | Alfalfa, Al<br><i>Medicago sativa</i>                                                        | Saudi-Arabia (SA)<br>Al-Ahsaa      | (32)        |
| <i>E. cloacae</i>          | SN19                                        | JQ904624                                     | 97.9%                            | <i>Teramnus labialis</i><br>tropical vine<br>rhizosphere                                     | India (I)                          | (33)        |
| <i>E. cloacae</i>          | P101                                        | NZ_CP006580                                  | 97.5%                            | Switchgrass, Pa<br><i>Panicum virgatum</i>                                                   | USA (US)<br>Wisconsin              | (34)        |
| <i>E. sp.</i>              | DC3<br>DC4                                  | AZX01000002<br>AZUB01000018                  | 97.5%<br>97.5%                   | Yellow yam, Y<br><i>Dioscorea cayenensis</i>                                                 | Jamaica (J)                        | (35)        |
| <i>E. cloacae</i>          | ENHKU01                                     | NC_018405                                    | 97.4%                            | Pepper (diseased),<br><i>Capsicum annuum</i>                                                 | Hong Kong<br>China (C)             | (36)        |
| <i>E. sp.</i>              | E20                                         | NZ_CP012999                                  | 97.3%                            | Rice, R<br><i>Oryza sativa</i>                                                               | China (C)<br>Zhejiang              | Unpublished |
| <i>E. sp.</i>              | SST3                                        | ALNS01000036                                 | 97.2%                            | Sugarcane<br><i>Saccharum officinarum</i>                                                    | Jamaica (J)                        | (37)        |
| <i>E. sp.</i>              | DC1                                         | AY919308                                     | 97.1%                            | Yellow yam, Y<br><i>Dioscorea cayenensis</i>                                                 | Jamaica (J)                        | (35)        |
| <i>E. cloacae</i>          | GS1                                         | AJXP01000035                                 | 97.0%                            | Rice, R<br>rhizosphere, root                                                                 | India (I)<br>Madurai               | (38, 39)    |
| <i>Kl. sp.</i>             | LTGPAF-6A                                   | NZ_CP017450                                  | 97.0%                            | Manna tree<br><i>Alhagi sparsifolia</i>                                                      | China (C)<br>Xinjiang              | Unpublished |
| <i>E. sp.</i>              | UCD-<br>UG_FMILLET                          | NZ_JRJC01000023                              | 97.0%                            | Finger Millet<br><i>Eleusine coracana</i><br>finger surface sterilized roots<br>millet seeds | Canada (Ca)<br>Planted<br>millet   | (40)        |
| <i>E. sp.</i>              | UYSO5<br>UYSO6<br>UYSO7<br>UYSO8            | JF262584<br>JF262585<br>JF262586<br>JF262587 | 96.6-96.8%                       | Sugarcane, S<br><i>Saccharum officinarum</i>                                                 | Uruguay (U)                        | (12)        |
| <i>E. sp.</i>              | 638                                         | NC_009436                                    | 96.7%                            | Poplar, P<br><i>Populus trichocarpa</i> × <i>P. deltoids</i>                                 | USA (US)<br>Washington             | (41, 42)    |
| <i>E. sp.</i>              | UYSO9                                       | JF262588                                     | 96.4%                            | Sugarcane, S<br><i>Saccharum officinarum</i>                                                 | Uruguay (U)                        | (12)        |
| <i>E. cloacae</i>          | BN-St2<br>LH-St1<br>PB-S2<br>PB-S1          | GU459201<br>GU459207<br>GU459209<br>GU459208 | 96.5%<br>96.4%<br>96.2%<br>96.0% | Sugarcane, S<br><i>Saccharum officinarum</i><br>rhizosphere                                  | Pakistan (P)<br>Punjab Province    | (7)         |
| <i>E. cloacae</i>          | PD-P6                                       | KP259668                                     | 97.2%<br>25.5% coverage          | Date palm<br><i>Phoenix dactylifera</i><br>rhizosphere                                       | Oman                               | (43)        |
| <i>Kluyvera intermedia</i> | CAV1151                                     | NZ_CP011602                                  | 98.1%                            | <i>Homo sapiens</i><br>perirectal                                                            | USA (US)                           | Unpublished |

|                        |              |              |      |                                            |             |             |
|------------------------|--------------|--------------|------|--------------------------------------------|-------------|-------------|
| <i>C. sp.</i>          | FDAARGOS_156 | NZ_CP014030  | 97.5 | <i>Homo sapiens</i><br>stool               | USA (US)    | Unpublished |
| <i>C. freundii</i>     | CAV1321      | NZ_CP011612  | 97.0 | <i>Homo sapiens</i><br>urine/genitourinary | USA (US)    | Unpublished |
| <i>C. amalonaticus</i> | FDAARGOS_165 | NZ_CP014070  | 97.2 | <i>Homo sapiens</i><br>stool               | USA (US)    | Unpublished |
| <i>C. amalonaticus</i> | FDAARGOS_122 | NZ_CP014015  | 97.1 | <i>Homo sapiens</i><br>urine               | USA (US)    | Unpublished |
| <i>C. koseri</i>       | FDAARGOS_164 | LORR01000010 | 97.1 | <i>Homo sapiens</i><br>urine cathether     | USA (US)    | Unpublished |
| <i>C. amalonaticus</i> | Y19          | NZ_CP011132  | 96.9 | waste-water sludge<br>digester             | South Korea | (44)        |

C = *Citrobacter*, E = *Enterobacter*, K = *Kosakonia*, Kl. = *Klebsiella*; unpublished = according to NCBI

## References

1. Remus R, Ruppel S, Jacob H-J, Hecht-Buchholz C, Merbach W. 2000. Colonization behaviour of two enterobacterial strains on cereals. *Biology and Fertility of Soils* 30:550-557.
2. Li Q-J, Cheng J-J, Sun S-X, Chen Y-P. 2016. Isolation, identification and characterization of associative nitrogen-fixing endophytic bacterium *Kosakonia radicincitans* GXGL-4A in maize. *Microbiology China* 43:2456-2463.
3. Bergottini VM, Filippidou S, Junier T, Johnson S, Chain PS, Otegui MB, Zapata PD, Junier P. 2015. Genome sequence of *Kosakonia radicincitans* strain YD4, a plant growth-promoting rhizobacterium isolated from Yerba Mate (*Ilex paraguariensis* St. Hill.). *Genome Announc* 3.
4. Peng G, Zhang W, Luo H, Xie H, Lai W, Tan Z. 2009. *Enterobacter oryzae* sp. nov., a nitrogen-fixing bacterium isolated from the wild rice species *Oryza latifolia*. *International Journal of Systematic and Evolutionary Microbiology* 59:1650-1655.
5. Li CH, Zhao MW, Tang CM, Li SP. 2010. Population dynamics and identification of endophytic bacteria antagonistic toward plant-pathogenic fungi in cotton root. *Microb Ecol* 59:344-56.
6. Suhaimi NS, Yap KP, Ajam N, Thong KL. 2014. Genome sequence of *Kosakonia radicincitans* UMEnt01/12, a bacterium associated with bacterial wilt diseased banana plant. *FEMS Microbiol Lett* 358:11-3.
7. Mehnaz S, Baig DN, Lazarovits G. 2010. Genetic and phenotypic diversity of plant growth promoting rhizobacteria isolated from sugarcane plants growing in pakistan. *J Microbiol Biotechnol* 20:1614-23.
8. Weber OB, Videira SS, Simoes de Araujo JL. 2013. Identification of culturable endophytes in Champaka pineapple grown in an organic system. *Afr J Agric Res* 8:3422-3430.
9. Madhaiyan M, Peng N, Te NS, Hsin IC, Lin C, Lin F, Reddy C, Yan H, Ji L. 2013. Improvement of plant growth and seed yield in *Jatropha curcas* by a novel nitrogen-fixing root associated *Enterobacter* species. *Biotechnol Biofuels* 6:140.
10. Zhu B, Zhou Q, Lin L, Hu C, Shen P, Yang L, An Q, Xie G, Li Y. 2013. *Enterobacter sacchari* sp. nov., a nitrogen-fixing bacterium associated with sugar cane (*Saccharum officinarum* L.). *Int J Syst Evol Microbiol* 63:2577-82.
11. Lin L, Li Z, Hu C, Zhang X, Chang S, Yang L, Li Y, An Q. 2012. Plant growth-promoting nitrogen-fixing enterobacteria are in association with sugarcane plants growing in Guangxi, China. *Microbes Environ* 27:391-8.
12. Taulé C, Mareque C, Barlocco C, Hackembruch F, Reis VM, Sicardi M, Battistoni F. 2012. The contribution of nitrogen fixation to sugarcane (*Saccharum officinarum* L.), and the identification and characterization of part of the associated diazotrophic bacterial community. *Plant and Soil* 356:35-49.

13. Ho Y-N, Chiang H-M, Chao C-P, Su C-C, Hsu H-F, Guo C-t, Hsieh J-L, Huang C-C. 2015. In planta biocontrol of soilborne Fusarium wilt of banana through a plant endophytic bacterium, Burkholderia cenocepacia 869T2. Plant and Soil 387:295-306.
14. Magnani GS, Didonet CM, Cruz LM, Picheth CF, Pedrosa FO, Souza EM. 2010. Diversity of endophytic bacteria in Brazilian sugarcane. Genet Mol Res 9:250-8.
15. Marcos FCC, Iório RdPF, Silveira APDd, Ribeiro RV, Machado EC, Lagôa AMMdA. 2016. Endophytic bacteria affect sugarcane physiology without changing plant growth. Bragantia 75:1-9.
16. Madhaiyan M, Poonguzhali S, Lee JS, Saravanan VS, Lee KC, Santhanakrishnan P. 2010. Enterobacter arachidis sp. nov., a plant-growth-promoting diazotrophic bacterium isolated from rhizosphere soil of groundnut. Int J Syst Evol Microbiol 60:1559-64.
17. Hardoim PR, van Overbeek LS, Berg G, Pirttilä AM, Compant S, Campisano A, Döring M, Sessitsch A. 2015. The hidden world within plants: ecological and evolutionary considerations for defining functioning of microbial endophytes. Microbiol Mol Biol Rev 79:293-320.
18. Ji K, Wang W, Zeng B, Chen S, Zhao Q, Chen Y, Li G, Ma T. 2016. Bacterial cellulose synthesis mechanism of facultative anaerobe Enterobacter sp. FY-07. Sci Rep 6:21863.
19. Hardoim PR, Nazir R, Sessitsch A, Elhottová D, Korenblum E, van Overbeek LS, van Elsas JD. 2013. The new species Enterobacter oryziphilus sp. nov. and Enterobacter oryzendophyticus sp. nov. are key inhabitants of the endosphere of rice. BMC Microbiol 13:164.
20. Dutta J, Handique PJ, Thakur D. 2015. Assessment of culturable tea rhizobacteria isolated from tea estates of Assam, India for growth promotion in commercial tea cultivars. Front Microbiol 6:1252.
21. Meng X, Bertani I, Abbruscato P, Piffanelli P, Licastro D, Wang C, Venturi V. 2015. Draft Genome Sequence of Rice Endophyte-Associated Isolate Kosakonia oryzae KO348. Genome Announc 3.
22. Shinjo R, Uesaka K, Ihara K, Loshakova K, Mizuno Y, Yano K, Tanaka A. 2016. Complete Genome Sequence of Kosakonia sacchari Strain BO-1, an Endophytic Diazotroph Isolated from a Sweet Potato. Genome Announc 4.
23. Kampfer P, McInroy JA, Doijad S, Chakraborty T, Glaeser SP. 2016. Kosakonia pseudosacchari sp nov., an endophyte of Zea mays. Systematic and Applied Microbiology 39:1-7.
24. Brady CL, Venter SN, Cleenwerck I, Engelbeen K, de Vos P, Wingfield MJ, Telechea N, Coutinho TA. 2009. Isolation of Enterobacter cowanii from Eucalyptus showing symptoms of bacterial blight and dieback in Uruguay. Lett Appl Microbiol 49:461-5.
25. Wei CY, Xing YX, Lin L, Yang LT, Li YR, Hu CJ. 2014. [Growth-promoting effect of inoculating Klebsiella variicola DX120E on different sugarcane cultivars]. Ying Yong Sheng Tai Xue Bao 25:2085-92.
26. Lin L, Wei C, Chen M, Wang H, Li Y, Li Y, Yang L, An Q. 2015. Complete genome sequence of endophytic nitrogen-fixing Klebsiella variicola strain DX120E. Stand Genomic Sci 10:22.
27. Rosenblueth M, Martinez L, Silva J, Martinez-Romero E. 2004. Klebsiella variicola, a novel species with clinical and plant-associated isolates. Syst Appl Microbiol 27:27-35.
28. Chen M, Li Y, Li S, Tang L, Zheng J, An Q. 2016. Genomic identification of nitrogen-fixing Klebsiella variicola, K. pneumoniae and K. quasipneumoniae. J Basic Microbiol 56:78-84.
29. Dong Y, Glasner JD, Blattner FR, Triplett EW. 2001. Genomic interspecies microarray hybridization: rapid discovery of three thousand genes in the maize endophyte, Klebsiella pneumoniae 342, by microarray hybridization with Escherichia coli K-12 open reading frames. Appl Environ Microbiol 67:1911-21.
30. Liu W, Wang Q, Hou J, Tu C, Luo Y, Christie P. 2016. Whole genome analysis of halotolerant and alkalotolerant plant growth-promoting rhizobacterium Klebsiella sp. D5A. Sci Rep 6:26710.
31. Singh RP, Jha P, Jha PN. 2015. The plant-growth-promoting bacterium Klebsiella sp. SBP-8 confers induced systemic tolerance in wheat (Triticum aestivum) under salt stress. J Plant Physiol 184:57-67.

32. Khalifa AY, Alsyeed AM, Almalki MA, Saleh FA. 2016. Characterization of the plant growth promoting bacterium, *Enterobacter cloacae* MSR1, isolated from roots of non-nodulating *Medicago sativa*. *Saudi J Biol Sci* 23:79-86.
33. Bose A, Kher MM, Nataraj M, Keharia H. 2016. Phytostimulatory effect of indole-3-acetic acid by *Enterobacter cloacae* SN19 isolated from *Teramnus labialis* (L. f.) spreng rhizosphere. *Biocatalysis and Agricultural Biotechnology* 6:128-137.
34. Humann JL, Wildung M, Pouchnik D, Bates AA, Drew JC, Zipperer UN, Triplett EW, Main D, Schroeder BK. 2014. Complete genome of the switchgrass endophyte *Enterobacter cloacae* P101. *Stand Genomic Sci* 9:726-34.
35. Gan HM, Triassi AJ, Wheatley MS, Savka MA, Hudson AO. 2014. High-quality draft whole-genome sequences of three strains of *Enterobacter* isolated from Jamaican *Dioscorea cayenensis* (Yellow Yam). *Genome Announc* 2.
36. Liu WY, Chung KM, Wong CF, Jiang JW, Hui RK, Leung FC. 2012. Complete genome sequence of the endophytic *Enterobacter cloacae* subsp. *cloacae* strain ENHKU01. *J Bacteriol* 194:5965.
37. Gan HM, McGroty SE, Chew TH, Chan KG, Buckley LJ, Savka MA, Hudson AO. 2012. Whole-genome sequence of *Enterobacter* sp. strain SST3, an endophyte isolated from Jamaican sugarcane (*Saccharum* sp.) stalk tissue. *J Bacteriol* 194:5981-2.
38. Shankar M, Ponraj P, Ilakkiam D, Gunasekaran P. 2011. Root colonization of a rice growth promoting strain of *Enterobacter cloacae*. *J Basic Microbiol* 51:523-30.
39. Shankar M, Ponraj P, Ilakkiam D, Rajendhran J, Gunasekaran P. 2012. Genome sequence of the plant growth-promoting bacterium *Enterobacter cloacae* GS1. *J Bacteriol* 194:4479.
40. Ettinger CL, Mousa WM, Raizada MN, Eisen JA. 2015. Draft Genome Sequence of *Enterobacter* sp. Strain UCD-UG\_FMILLET (Phylum Proteobacteria). *Genome Announc* 3.
41. Taghavi S, van der Lelie D, Hoffman A, Zhang YB, Walla MD, Vangronsveld J, Newman L, Monchy S. 2010. Genome sequence of the plant growth promoting endophytic bacterium *Enterobacter* sp. 638. *PLoS Genet* 6:e1000943.
42. Taghavi S, Garafola C, Monchy S, Newman L, Hoffman A, Weyens N, Barac T, Vangronsveld J, van der Lelie D. 2009. Genome survey and characterization of endophytic bacteria exhibiting a beneficial effect on growth and development of poplar trees. *Appl Environ Microbiol* 75:748-57.
43. Yaish MW, Antony I, Glick BR. 2015. Isolation and characterization of endophytic plant growth-promoting bacteria from date palm tree (*Phoenix dactylifera* L.) and their potential role in salinity tolerance. *Antonie Van Leeuwenhoek* 107:1519-32.
44. Ainala SK, Ashok S, Ko Y, Park S. 2013. Glycerol assimilation and production of 1,3-propanediol by *Citrobacter amalonaticus* Y19. *Appl Microbiol Biotechnol* 97:5001-11.

**Tab. S2:** Plant growth-promoting effects of *Kosakonia radicincitans* DSM16656<sup>T</sup>

| Year       | G*/F* | Crop/ plant                                                    | Cultivar/accession | Criterion        | Efficiency** ( increase compared to respective control) | Reference |
|------------|-------|----------------------------------------------------------------|--------------------|------------------|---------------------------------------------------------|-----------|
| 1987       | F     | Wheat<br>( <i>Triticum aestivum</i> L.)                        | Taras              | grain yield      | +5%                                                     | (1)       |
| 1988       | F     |                                                                | Alcedo             |                  | +13%                                                    |           |
| 1989       | F     |                                                                | Regina             |                  | +8%                                                     |           |
| 1990       | F     |                                                                | Regina             |                  | +8%                                                     |           |
| 1995       | F     |                                                                | Bussard            |                  | +21%                                                    |           |
| 1995       | F     |                                                                | Greif              |                  | +23%                                                    |           |
| 1995       | F     |                                                                | Ramiro             |                  | +3%                                                     |           |
| 1989, 1990 | F     | Pea<br>( <i>Pisum sativum</i> L.)                              | Grapis             | dry matter       | +48%                                                    | (2)       |
|            |       |                                                                |                    | seed yield       | +19%, +29%                                              |           |
| 1990       | F     | Maize<br>( <i>Zea mays</i> L.)                                 | Bekenova           | shoot dry matter | +4%                                                     | (3)       |
|            |       |                                                                |                    | grain yield      | +9%                                                     |           |
| 1991       | F     |                                                                |                    | shoot dry matter | +7%                                                     |           |
|            |       |                                                                |                    | grain yield      | +15%                                                    |           |
| 1992       | F     |                                                                |                    | shoot dry matter | +3%                                                     |           |
|            |       |                                                                |                    | grain yield      | +8%                                                     |           |
| 2006       | G     | Kohlrabi ( <i>Brassica oleracea</i> var. <i>gongylodes</i> L.) | RZ Eder            | root dry matter  | +47%                                                    | (4)       |
|            |       |                                                                |                    | leaf dry matter  | +36%                                                    |           |
|            |       |                                                                |                    | tuber dry matter | +37%                                                    |           |
| 2007       | F     | Oilseed rape<br>( <i>Brassica napus</i> L.)                    |                    | shoot biomass    | +5%, +12%                                               | (5)       |
| 2010       | F     | Radish ( <i>R. sativus</i> var. <i>sativus</i> L.)             | Rondar             | tuber yield      | +23%                                                    | (6)       |
|            |       |                                                                |                    | leaf yield       | +20%                                                    |           |
| 2011       | F     |                                                                |                    | tuber yield      | +14%                                                    |           |
|            |       |                                                                |                    | leaf yield       | +23%                                                    |           |
| 2012       | G     | Thale cress ( <i>Arabidopsis thaliana</i> L.)                  | Columbia           | seed weight      | + up to 30%                                             | (7)       |
|            |       |                                                                |                    | rosette diameter | + approx. 10%                                           |           |
| 2012       | G     | Tomato<br>( <i>Solanum lycopersicum</i> L.)                    | Vanessa            | root dry matter  | +120%, +180%                                            | (8)       |
|            |       |                                                                |                    | shoot dry matter | +140%, +150%                                            |           |
|            |       |                                                                |                    | stalk length     | +27%, +29%                                              |           |

G\*: glasshouse experiment F\*: field experiment, \*\*depending on concentration of inoculant

1. Remus R, Ruppel S, Jacob HJ, Hecht-Buchholz C, Merbach W. 2000. Colonization behaviour of two enterobacterial strains on cereals. *Biol Fert Soils* 30:550-557.
2. Höflich G, Wiehe W, Kühn G. 1994. Plant growth stimulation by inoculation with symbiotic and associative rhizosphere microorganisms. *Experientia* 50:897-905.
3. Ruppel S. 2000. Bedeutung der rhizosphären- und endophytischen Bakterien für die Pflanzenernährung. *Arch Agron Soil Sci* 45:329-341.
4. Ruppel S, Rühlmann J, Merbach W. 2006. Quantification and localization of bacteria in plant tissues using quantitative real-time PCR and online emission fingerprinting. *Plant Soil* 286.
5. Krey T, Caus M, Baum C, Ruppel S, Eichler-Lobermann B. 2011. Interactive effects of plant growth-promoting rhizobacteria and organic fertilization on P nutrition of *Zea mays* L. and *Brassica napus* L. *J Plant Nutr Soil Sc* 174:602-613.
6. Berger B, Wiesner M, Brock AK, Schreiner M, Ruppel S. 2015. *K. radicincitans*, a beneficial bacteria that promotes radish growth under field conditions. *Agron Sustain Dev* 35:1521-1528.
7. Brock AK, Berger B, Mewis I, Ruppel S. 2013. Impact of the PGPB *Enterobacter radicincitans* DSM 16656 on growth, glucosinolate profile, and immune responses of *Arabidopsis thaliana*. *Microb Ecol* 65:661-670.
8. Berger B, Brock AK, Ruppel S. 2013. Nitrogen supply influences plant growth and transcriptional responses induced by *Enterobacter radicincitans* in *Solanum lycopersicum*. *Plant Soil* 370:641-65

The closely related *Kosakonia arachidis* Ah-143<sup>T</sup> offers a similar potential like *K. radicincitans* DSM 16656<sup>T</sup>. *K. arachidis* Ah-143<sup>T</sup> inoculated mustard, tomato or rice seeds increased their root length by 61.1, 21.6 and 10.4 %, respectively. Sugarcane seedlings that were inoculated with *Kosakonia sacchari* SP1<sup>T</sup> showed higher dry weights and nitrogen contents than those of non-inoculated controls plants (Chen et al., 2014). Though several tree species have been reported to host *Kosakonia* and closely related strains only one tree species was described to benefit from the inoculation with PGPB. *Enterobacter* sp. 638 increased the growth index of different poplar varieties by up to 40% compared to their respective controls (Taghavi et al., 2010). The endophytic bacterium Y01 (FJ205690) from cotton (*Gossypium arboreum*), sharing 99.9% of 16S rRNA sequence with DSM 16656<sup>T</sup>, was shown to be the only strain out of 39 isolated ones – chosen by antagonism to fungal pathogens – that also increased shoot length. *Enterobacter* sp. NN145S and *Kosakonia sacchari* NN143E isolated from rhizosphere soil and surface-sterilized roots, respectively, of the same ROC22 plant were used to inoculate micropropagated sugarcane plantlets. Both strains increased the biomass and nitrogen content of the sugarcane seedlings (Lin et al., 2012).

## References

- Chen MY, Zhu B, Lin L, Yang LT, Li YR & An QL (2014) Complete genome sequence of *Kosakonia sacchari* type strain SP1(T). *Stand Genomic Sci* **9**.
- Lin L, Li Z, Hu C, Zhang X, Chang S, Yang L, Li Y & An Q (2012) Plant growth-promoting nitrogen-fixing enterobacteria are in association with sugarcane plants growing in Guangxi, China. *Microbes Environ* **27**: 391-398.
- Taghavi S, van der Lelie D, Hoffman A, Zhang YB, Walla MD, Vangronsveld J, Newman L & Monchy S (2010) Genome sequence of the plant growth promoting endophytic bacterium *Enterobacter* sp. 638. *PLoS Genet* **6**: e1000943.

**Tab. S3:** Number of annotated genes of *Kosakonia radicincitans* DSM16656<sup>T</sup> and expression profile from strain-specific microarray experiment in which liquid culture of DSM16656<sup>T</sup> was exposed to tomato root exudates

|                                                                  |              |                                                              |
|------------------------------------------------------------------|--------------|--------------------------------------------------------------|
| <b>Total Genes</b>                                               | <b>6058</b>  | <b>Chr.: 5680, L.pl.: 359, S.pl.: 19</b>                     |
| CDS                                                              | 5839         | Chr.: 5465, L.pl.: 355, S.pl.: 19                            |
| rRNA                                                             | 22           | Chr.: 5S:8   16S:7   23S: 7                                  |
| tRNA                                                             | 83           | Chr.: 83                                                     |
| other RNAs                                                       | 114          | Chr.: 110, L.pl.: 4                                          |
|                                                                  |              |                                                              |
| <b>CDS</b>                                                       | <b>5839</b>  | <b>Chr.: 5465, L.pl.: 355, S.pl.: 19</b>                     |
| <b>PROKKA annotated</b>                                          | <b>4756</b>  | <b>Chr.: 4602, L.pl.: 151, S.pl.: 3</b>                      |
| PROKKA hypothetical proteins                                     | 1083         | Chr.: 863, L.pl.: 204, S.pl.: 16                             |
| Interpro (GO) annotated                                          | 3828         | Chr.: 3723 , L.pl.: 102, S.pl.: 3                            |
| Koala (KEGG) annotated                                           | 4337         | Chr.: 4056, L.pl.: 266, S.pl.: 15                            |
| GO+KEGG                                                          | 5081         | Chr.: 4781, L.pl.: 283, S.pl.: 17                            |
| PROKKA+GO+KEGG                                                   | 5469         | Chr.: 5152, L.pl.: 300, S.pl.: 17                            |
| CDS represented on Microarray                                    | 5512         | Chr.: 5243, L.pl.: 269                                       |
|                                                                  |              |                                                              |
| <b>PROKKA hypothetical proteins</b>                              | <b>1083</b>  | Chr.: 863, L.pl.: 204, S.pl.: 16                             |
| Inhouse pipeline combining PROKKA, GO and KEGG: missing function | 370          | Chr.: 313, L.pl.: 55, S.pl.: 2                               |
|                                                                  |              |                                                              |
|                                                                  |              | <b>Significant expression changes</b>                        |
|                                                                  |              | <b>number of genes      percentage</b>                       |
| <b>CDS with expression profile</b>                               | <b>5512</b>  | <b>*2959 (pV=0.05): Chr.: 2860, L.pl.: 99 of 2959 genes</b>  |
| up-regulated                                                     | 2483         | <b>*1470 (pV=0.05): Chr.: 1414, L.pl.: 56      50% up</b>    |
| down-regulated                                                   | 3029         | <b>*1489 (pV=0.05) : Chr.: 1446, L.pl.: 43      50% down</b> |
| FC > = 2  (FC 2)                                                 | 1658         | <b>*1526 (pV=0.05) : Chr.: 1481, L.pl.: 45 of 1526 genes</b> |
| up-regulated (FC 2)                                              | 880          | <b>*843 (pV=0.05) : Chr.: 820, L.pl.: 23      55% up</b>     |
| down-regulated (FC 2)                                            | 778          | <b>*683 (pV=0.05) : Chr.: 661, L.pl.: 22      45% down</b>   |
| FC > = 1,5  (FC 1,5)                                             | 2791         | <b>*2332 (pV=0.05) : Chr.: 2260, L.pl.: 72 of 2332 genes</b> |
| up-regulated (FC 1,5)                                            | 1355         | <b>*1197 (pV= 0.05) : Chr.: 1156, L.pl.: 41      51% up</b>  |
| down-regulated (FC 1,5)                                          | 1436         | <b>*1135 (pV=0.05) : Chr.: 1104, L.pl.: 31      49% down</b> |
| Motility & Chemotaxis (FC 1,5)                                   | 111 (of 214) | <b>*96 (pV=0.05): Chr.: 93, L.pl.: 3      of 96 genes</b>    |
| up-regulated (FC 1,5)                                            | 87           | <b>*83 (pV=0.05) : Chr.: 80, L.pl.: 3      86% up</b>        |
| down-regulated (FC 1,5)                                          | 24           | <b>*13 (pV=0.05): Chr.: 13      14% down</b>                 |

CDS = coding sequence, Chr. = chromosome, L.pl. = large plasmid, S.pl = small plasmid, FC = fold change, pV = p-value,

\* number of genes with significant expression changes, \*\*percentage of genes significantly up-regulated and down-regulated, respectively

**Tab. S4:** Amino acid sequence identity of T6SS.3 genes of *Kosakonia radicincitans* DSM 16656<sup>T</sup> to best hits of other bacterial taxa performing BLASTp searches

| gene         | worst hit within<br><i>K. radicincitans</i> | best other hit |
|--------------|---------------------------------------------|----------------|
| <i>clpV</i>  | 90.7                                        | 69.5           |
| <i>tssM</i>  | 87.6                                        | 56.7           |
| <i>tssL</i>  | 95.6                                        | 58.6           |
| <i>tssK</i>  | 91.4                                        | 73.2           |
| <i>tssJ</i>  | 90.0                                        | 71.4           |
| <i>tssA</i>  | 90.0                                        | 61.8           |
| PAAR         | 97.0                                        | 93.9           |
| <i>tagK1</i> | 94.6                                        | 55.3           |
| <i>vgrG</i>  | 86.5                                        | 60.4           |
| <i>tssG</i>  | 92.7                                        | 67.8           |
| <i>tssF</i>  | 93.7                                        | 63.4           |
| <i>tssE</i>  | 80.0                                        | 52.9           |
| <i>hcp*</i>  | 93.1                                        | 67.5           |
| <i>tssC</i>  | 96.8                                        | 88.6           |
| <i>tssB</i>  | 96.3                                        | 85.8           |
| average      | 91.7                                        | 68.5           |

**Tab. S5:** Supportive information to **Figure 4B**: Each box represents the exact number of genes shared between *Kosakonia radicincitans* DSM 16656<sup>T</sup> and another bacterial strain per gene cluster of particular interest

| strain         | KFS.1a | KFS.1b | KFS.2 | T6SS.1 | T6SS.2 | T6SS.3 | xerC | NAR | NIF | ANF | PHO | PST | lpcD | GAB | dcyD | BUD | CYS | OPU | PRO | ENT | FEP | FHU | pqqE | la-pla | sm-pla |
|----------------|--------|--------|-------|--------|--------|--------|------|-----|-----|-----|-----|-----|------|-----|------|-----|-----|-----|-----|-----|-----|-----|------|--------|--------|
| DSM 16656      | 71     | 14     | 55    | 14     | 19     | 13     | 6    | 9   | 20  | 7   | 8   | 5   | 1    | 4   | 1    | 3   | 9   | 10  | 4   | 9   | 6   | 12  | 1    | 355    | 19     |
| Ola 51         | 70     | 14     | 55    | 14     | 16     | 13     | 2    | 8   | 20  | 7   | 8   | 5   | 1    | 4   | 1    | 3   | 9   | 10  | 4   | 9   | 6   | 12  | 0    | 0      | 0      |
| GXGL-4A        | 71     | 14     | 55    | 10     | 19     | 13     | 4    | 8   | 20  | 7   | 8   | 5   | 1    | 4   | 1    | 3   | 9   | 10  | 4   | 9   | 6   | 12  | 0    | 4      | 1      |
| YD4            | 71     | 14     | 55    | 14     | 17     | 13     | 1    | 8   | 20  | 7   | 8   | 5   | 1    | 4   | 1    | 3   | 9   | 10  | 4   | 9   | 6   | 12  | 0    | 1      | 0      |
| UMEnt01/12     | 68     | 14     | 53    | 13     | 18     | 12     | 5    | 8   | 20  | 7   | 8   | 5   | 1    | 4   | 1    | 3   | 9   | 10  | 4   | 9   | 6   | 11  | 0    | 14     | 0      |
| REICA_142      | 63     | 14     | 5     | 13     | 16     | 0      | 1    | 8   | 20  | 0   | 8   | 5   | 1    | 3   | 1    | 3   | 9   | 0   | 3   | 8   | 5   | 6   | 0    | 10     | 1      |
| FY-07          | 63     | 14     | 3     | 0      | 17     | 0      | 2    | 8   | 20  | 0   | 8   | 4   | 1    | 2   | 1    | 3   | 9   | 10  | 4   | 8   | 5   | 9   | 0    | 2      | 7      |
| REICA_082      | 64     | 14     | 3     | 0      | 18     | 0      | 1    | 8   | 20  | 0   | 8   | 4   | 1    | 2   | 1    | 3   | 9   | 9   | 4   | 8   | 4   | 9   | 0    | 2      | 0      |
| SP1            | 68     | 14     | 26    | 14     | 17     | 0      | 2    | 8   | 20  | 0   | 7   | 5   | 1    | 3   | 1    | 3   | 9   | 4   | 3   | 8   | 5   | 10  | 0    | 5      | 0      |
| R4-368         | 68     | 14     | 52    | 14     | 17     | 0      | 2    | 8   | 20  | 0   | 7   | 5   | 1    | 3   | 1    | 3   | 9   | 4   | 3   | 8   | 4   | 10  | 0    | 12     | 1      |
| KO348          | 67     | 14     | 6     | 4      | 18     | 0      | 1    | 8   | 20  | 0   | 7   | 5   | 1    | 3   | 1    | 3   | 9   | 4   | 3   | 8   | 4   | 10  | 0    | 3      | 0      |
| BO-1           | 68     | 14     | 4     | 0      | 17     | 0      | 1    | 8   | 20  | 0   | 7   | 5   | 1    | 3   | 1    | 3   | 9   | 4   | 3   | 8   | 5   | 9   | 0    | 7      | 0      |
| SBP-8          | 59     | 14     | 4     | 4      | 16     | 0      | 1    | 7   | 0   | 0   | 5   | 4   | 1    | 3   | 1    | 3   | 9   | 4   | 3   | 7   | 5   | 7   | 0    | 3      | 0      |
| DX120E         | 25     | 0      | 4     | 14     | 0      | 0      | 3    | 7   | 20  | 0   | 8   | 4   | 1    | 3   | 1    | 3   | 9   | 4   | 3   | 7   | 5   | 8   | 0    | 36     | 1      |
| DSM 15968      | 25     | 0      | 4     | 14     | 0      | 0      | 1    | 7   | 20  | 0   | 8   | 4   | 1    | 3   | 1    | 3   | 9   | 4   | 3   | 7   | 5   | 8   | 0    | 33     | 0      |
| 342            | 25     | 0      | 4     | 13     | 0      | 0      | 2    | 7   | 20  | 0   | 8   | 4   | 1    | 3   | 1    | 3   | 9   | 4   | 3   | 7   | 5   | 7   | 0    | 49     | 0      |
| D5A            | 25     | 0      | 4     | 13     | 0      | 0      | 3    | 7   | 20  | 0   | 8   | 4   | 1    | 3   | 1    | 3   | 9   | 4   | 3   | 7   | 5   | 8   | 0    | 34     | 0      |
| P101           | 61     | 14     | 40    | 14     | 18     | 0      | 1    | 7   | 0   | 0   | 6   | 4   | 1    | 3   | 1    | 3   | 9   | 4   | 3   | 7   | 5   | 8   | 0    | 11     | 1      |
| DC3            | 58     | 14     | 4     | 14     | 17     | 0      | 2    | 7   | 0   | 0   | 6   | 4   | 1    | 3   | 1    | 3   | 9   | 4   | 3   | 7   | 5   | 7   | 0    | 15     | 0      |
| DC4            | 58     | 14     | 49    | 14     | 17     | 0      | 3    | 7   | 0   | 0   | 6   | 4   | 1    | 3   | 1    | 3   | 9   | 4   | 3   | 7   | 5   | 7   | 0    | 17     | 0      |
| ENHKU01        | 57     | 14     | 2     | 14     | 16     | 0      | 1    | 7   | 0   | 0   | 5   | 4   | 1    | 3   | 1    | 3   | 9   | 4   | 3   | 6   | 5   | 8   | 0    | 5      | 0      |
| SST3           | 56     | 14     | 4     | 4      | 16     | 0      | 2    | 7   | 0   | 0   | 6   | 4   | 1    | 3   | 1    | 3   | 9   | 4   | 3   | 7   | 4   | 7   | 0    | 8      | 1      |
| DC1            | 56     | 14     | 4     | 13     | 17     | 0      | 1    | 7   | 0   | 0   | 6   | 4   | 1    | 3   | 1    | 3   | 9   | 4   | 3   | 6   | 5   | 7   | 0    | 10     | 1      |
| GS1            | 59     | 14     | 2     | 5      | 7      | 0      | 1    | 7   | 0   | 0   | 5   | 4   | 1    | 3   | 1    | 3   | 7   | 4   | 1   | 3   | 3   | 7   | 0    | 1      | 0      |
| 638            | 63     | 14     | 0     | 6      | 0      | 0      | 2    | 7   | 0   | 0   | 6   | 4   | 1    | 3   | 1    | 3   | 8   | 4   | 3   | 7   | 4   | 9   | 0    | 12     | 1      |
| UCD-UG FMILLET | 59     | 14     | 3     | 14     | 16     | 0      | 1    | 7   | 0   | 0   | 5   | 4   | 1    | 3   | 1    | 3   | 9   | 4   | 3   | 7   | 4   | 8   | 0    | 18     | 1      |
| FDAARGOS_156   | 61     | 13     | 11    | 14     | 0      | 0      | 2    | 7   | 0   | 0   | 6   | 4   | 1    | 2   | 1    | 0   | 8   | 0   | 3   | 7   | 4   | 10  | 0    | 30     | 0      |
| CAV1321        | 62     | 14     | 2     | 1      | 0      | 0      | 2    | 7   | 0   | 0   | 6   | 4   | 1    | 2   | 1    | 0   | 8   | 0   | 3   | 7   | 5   | 9   | 1    | 254    | 1      |
| FDAARGOS_165   | 58     | 14     | 2     | 6      | 3      | 0      | 3    | 6   | 0   | 0   | 6   | 4   | 0    | 2   | 1    | 0   | 7   | 4   | 3   | 6   | 5   | 6   | 0    | 32     | 1      |
| FDAARGOS_164   | 58     | 14     | 14    | 8      | 1      | 0      | 1    | 7   | 0   | 0   | 5   | 4   | 1    | 2   | 1    | 0   | 8   | 4   | 3   | 6   | 6   | 9   | 0    | 28     | 1      |
| FDAARGOS_122   | 62     | 14     | 0     | 0      | 0      | 0      | 1    | 7   | 0   | 1   | 6   | 4   | 1    | 2   | 1    | 0   | 8   | 4   | 3   | 6   | 5   | 5   | 0    | 31     | 0      |
| Y19            | 61     | 14     | 0     | 2      | 2      | 3      | 4    | 7   | 0   | 0   | 6   | 4   | 1    | 2   | 1    | 0   | 8   | 4   | 3   | 7   | 5   | 7   | 0    | 230    | 1      |
| F113           | 40     | 8      | 22    | 9      | 14     | 4      | 1    | 7   | 1   | 0   | 3   | 3   | 0    | 2   | 1    | 1   | 7   | 6   | 2   | 2   | 0   | 3   | 0    | 20     | 0      |
| 3841           | 25     | 2      | 12    | 0      | 0      | 0      | 1    | 2   | 8   | 1   | 4   | 4   | 0    | 2   | 0    | 1   | 4   | 2   | 2   | 2   | 0   | 5   | 0    | 23     | 1      |
| FZB42          | 20     | 2      | 11    | 0      | 0      | 0      | 0    | 5   | 1   | 0   | 3   | 3   | 0    | 2   | 0    | 3   | 4   | 4   | 2   | 5   | 2   | 1   | 0    | 8      | 0      |

**Tab. S6:** Percentage of chromosomal and large plasmid genes of *Kosakonia radicincitans* DSM 16656<sup>T</sup> with KEGG annotation contributing to metabolic pathways

| Pathway<br>(KEGG terminology)                | chromosome | large plasmid                                            |
|----------------------------------------------|------------|----------------------------------------------------------|
| Metabolic pathways                           | 696 genes  | 57 genes<br>(24 of them = 42% are missing on chromosome) |
| Microbial metabolism in diverse environments | 33%        | 39%                                                      |
| Carbon metabolism                            | 16%        | 21%                                                      |
| Methane metabolism                           | 5%         | 14%                                                      |
| ABC transporters                             | 28%        | 14%                                                      |
| Quorum sensing                               | 8%         | 12%                                                      |
| Oxidative phosphorylation                    | 6%         | 9%                                                       |
| Flagellar assembly                           | 5%         | 5%                                                       |
| Bacterial secretion system                   | 4%         | 2%                                                       |
| Biofilm formation - <i>Escherichia coli</i>  | 4%         | 4%                                                       |
| Propanoate metabolism                        | 4%         | 18%                                                      |
| Porphyrin and chlorophyll metabolism         | 5%         | 9%                                                       |
| Glycerolipid metabolism                      | 2%         | 11%                                                      |
| Glycerophospholipid metabolism               | 4%         | 5%                                                       |
| Nitrogen metabolism                          | 4%         | 2%                                                       |
| Bacterial chemotaxis                         | 3%         | 5%                                                       |
| Chloroalkane and chloroalkene degradation    | 1%         | 5%                                                       |
| Degradation of aromatic compounds            | 1%         | 5%                                                       |

4337 genes of *Kosakonia radicincitans* DSM16656<sup>T</sup> were KEGG annotated, 3070 of them were considered in a KEGG pathway search, and 720 different KEGG identifiers were assigned to pathways.

## MATERIAL and METHODS

(including details such as primer sequences and links to applied computer programs)

### Characterization of phosphate solubilizing ability of DSM 16656<sup>T</sup> on plate assay

The ability of *K. radicincitans* DSM 16656<sup>T</sup> to solubilize different inorganic phosphate sources (tricalcium phosphate, hydroxyapatite, Algerian rock phosphate (RP), Cameroonian RP, Malian RP, Mexican RP and Moroccan RP) was assessed on modified NBRIP (National Botanical Research Institute's Phosphate growth medium) plates (Nautiyal 1999). NBRIP medium was prepared with 20 g glucose, 5 g MgCl<sub>2</sub>·6H<sub>2</sub>O, 0.25 g MgSO<sub>4</sub>·7H<sub>2</sub>O, 0.2 g KCl, 0.1 g (NH<sub>4</sub>)<sub>2</sub>SO<sub>4</sub>, one of the abovementioned phosphate types at 5 g, 0.5% Bromocresol Green (BCG), and 15 g agar per L, and pH adjusted to 7.5. The BCG stock solution was prepared by dissolving 5 g BCG in 100 mL of 70% ethanol and pH adjusted to 6.5 with 1M KOH (Fankem et al., 2014). All phosphate sources were washed prior to use to remove soluble fractions by drenching with warm water for 1 h and rinsing. Afterwards, phosphate sources were soaked for 24 h before rinsing. The process was repeated twice. The phosphate sources were dried at 60°C, and homogenized before use. A single bacterial colony was grown over night in 50 mL in nutrient broth (Standard nutrient broth I, Carl Roth, Germany) at 28°C. The OD<sub>620</sub> was adjusted to 0.2 and 10 µL of bacterial suspension were spotted on three compartmented Petri dishes for each phosphate source. Plates were incubated at 28°C for 7 days and the extent of phosphate solubilization was assessed. The index of solubilization was used as an indicator for the isolate efficiency: IS = (Colony diameter + diameter of halo zone)/ Colony diameter (Fankem et al., 2014).

### Bacterial transformation and cultivation for Confocal Laser Scanning Microcopy (CLSM)

For plant colonization studies, electro-competent cells of *K. radicincitans* DSM 16656<sup>T</sup> were transformed with enhanced green fluorescent protein (eGFP)-containing plasmid pMP4655 (Bloemberg et al., 2000; Lagendijk et al., 2010). DSM 16656<sup>T</sup> cells were made electro competent using a standard protocol (Gonzales et al., 2013). Transformation of DSM 16656<sup>T</sup> with pMP4655 was performed using a Micro Pulser (Biorad), and cells were regenerated in 1 mL Super Optimal Broth (SOB) plus 20 mM glucose for 1 h and grown over night on LB supplemented with gentamycin (150 µL/mL) at 30°C. Plasmid integration was shown by colony-PCR using primers MC EG-f (GTGAGCAAGGGCGAGGAGCTG) and MC EG-r (CTTGTACAGCTCGTCCATGCCG) for pMP4655 eGFP amplification. PCR was performed with Dream Taq Polymerase (Qiagen) at 60°C annealing temperature with an elongation time of 40 s for 30 cycles in a 20 µL reaction. Single colonies of DSM 16656<sup>T</sup> expressing eGFP grown on Luria-Bertani agar plus gentamycin (150 µg/mL) were cultured overnight in standard nutrient broth (Merck). The cells were pelleted by centrifugation, washed twice in sterile ultrapure water, re-suspended in sterile ultrapure water to give an OD<sub>620</sub> of 0.2 (corresponding to 10<sup>9</sup> cfu mL<sup>-1</sup>) and finally further diluted to a concentration of 10<sup>7</sup> cfu mL<sup>-1</sup>.

### Plant cultivation and inoculation of eGFP expressing DSM 16656<sup>T</sup> for CLSM

*Arabidopsis thaliana* accession Col-0 and *S. lycopersicum* cv. Micro-Tom were raised as *in vitro* cultures. Seeds were surface-sterilized with a solution containing 5% NaOCl and 0.5% Tween 20,

rinsed several times in sterile water, dried and incubated at 4°C for 3 days for stratification on sterile plates containing 1/2-strength Murashige-Skoog (Duchefa) medium and afterwards grown under short day conditions (8 h photoperiod at 22°C and 40-60% relative humidity) in a vertical position for two weeks. Plants were transferred to 11 mL sterile ultrapure water and kept for 24 h to adjust to the changed conditions before 10<sup>5</sup> bacterial cells were added to each plant. Water levels were adjusted on a daily basis to account for evaporation and plant-based water losses. Bacterial root colonization was monitored after 6 days. Roots were gently washed in sterile water and fluorescence was recorded with a Zeiss LSM 510 META laser scanning confocal microscope (Carl Zeiss Jena GmbH). Bacterial eGFP fluorescence signals were captured using argon laser excitation at 488 nm (BP505-550 180 filter, Plan Apo 63/1.4 oil lens), and roots were captured using bright field settings.

### TEM Microscopy

Conventional negative contrast staining was used for electron microscopic investigations. Cells of *K. radicincitans* DSM 16656<sup>T</sup> were taken from semi solid (0.5%) agar and placed in 0.05 M saline solution. One drop of this bacterial solution was applied to Pioloform-carbon-coated, 400-mesh copper grids (Plano GmbH) for 10 min, fixed with 2.5% aqueous glutaraldehyde solution for 1 min, stained with 2.5% uranyl acetate solution for 1 min, and examined by transmission electron microscopy using a JEM-1400 Plus (JEOL) at an acceleration voltage of 120 kV.

### Gene annotation and functional annotation

Genome annotation was derived from PROKKA

(<http://www.vicbioinformatics.com/software/prokka.shtml>), RNAmmer

(<http://www.cbs.dtu.dk/services/RNAmmer/>) and ARAGORN (<http://130.235.46.10/ARAGORN/>).

Functional annotation was received from the SEED-based “Rapid Annotations using Subsystems Technology” (RAST) tool from the RAST server (<http://rast.nmpdr.org>) and pathway classification from “KEGG Orthology And Links Annotation” tool (BlastKOALA, <http://www.kegg.jp/blastkoala/>).

### Genome comparison

The genome sequences of 31 closely related and three more distantly related PGPB (*Pseudomonas fluorescens* F113, *Rhizobium leguminosarum* bv. *viciae* 3841, *Bacillus velezensis* FZB42) were compared to *K. radicincitans* DSM 16656<sup>T</sup>. The phylogenetic distance was calculated according to the 16S rRNA gene sequence after running BLASTn against NCBI and RDP, doing a Muscle Alignment and building a bootstrap supporting NJ-tree (Geneious 8.1.9, Genetic Distance Model: Jukes-Cantor, 10,000 replicates) for the candidate strains. Another tree was generated for the concatenated amino acid sequence of four phylogenetic markers (AtpD, GyrB, InfB, RecA). The nucleotide and amino acid sequences for the whole genomes were retrieved from NCBI. To obtain conserved genomic regions a MAUVE alignment was done for each phylogenetic group: *K. radicincitans* (KORA), *Kosakonia sacchari* (KOSA), *Enterobacter* (ENTERO) and *Klebsiella variicola* (KLEVA) with our strains as reference.

Furthermore, to detect orthologous and paralogous genes and gene clusters BLASTp+ and an in-house pipeline were applied, considering the reciprocal best hit algorithm (RBH) and scoring, as well

as the conserved regions. The resulting clusters were divided into the different phylogenetic group clusters for core genome assignment. For visualization SVG files were generated with BRIG and in-house scripts.

### **Customized microarray design, analysis and quality control**

The web based eArray application (Agilent Technologies, <http://www.genomics.agilent.com/en/Custom-Design-Tools/eArray>) was used for microarray design. Raw signal intensity values were determined using Agilent standard protocol for Affymetrix Microarray Analyzer from ATLAS-Biolabs. Probe level values (Agilent 'gProcessedSignal') were preprocessed using Quantile normalization from R-package preprocessCore (<https://www.bioconductor.org/packages/devel/bioc/manuals/preprocessCore/man/preprocessCore.pdf>) and log transformed.

### **Statistical analysis and Sliding Window calculation**

Data/values of the treatment group (n = 3 samples, D5St1, D5St2, D5St4) and the control group (n = 4 samples, D5Wu1, D5Wu2, D5Wu3, D5Wu4) were averaged. Test-statistics were calculated using a two-sample t-test method with unequal variances (Welch-Test). The log-fold changes were calculated via the difference of the group means. The following two criteria were applied to estimate the significance of differential expression: (i) corrected T-test p-value < 0.05, multiple testing corrections was performed using  $fdr = false\ discovery\ rate$  (Benjamini Hochberg), and (ii) at least one of the two mean expression values (control and/or treatment) > 0.5. A low absolute fold change was no criterion for exclusion as long as the other criteria were fulfilled. Overrepresentation analyses of the candidate genes compared to the whole genome were performed in order to elucidate significant enriched gene sets by Gene Ontology (GO) terms using fishers exact test method (p-value < 0.05, not corrected). All statistical calculations were performed via in-house developed scripts using standard methods from R/Bioconductor platform (Gentleman et al., 2004) and appropriate packages. In order to determine genomic regions of *K. radicincitans* DSM 16656<sup>T</sup> differentially expressed (up- or down-regulated) in response to root exudates, a genome-wide sliding window calculation was performed considering a window size of 15 consecutive genes.

### **Microbiome PhyloChip analysis**

In high quality DNA the bacterial 16S rRNA genes were amplified using the degenerate forward primer: 27F.1 5'-AGRGTTTGATCMTGGCTCAG-3' and the non-degenerate reverse primer: 1492R.jgi 5'-GGTACCTTGTTACGACTT-3'. Thirty-five cycles of bacterial 16S rRNA gene PCR amplification were performed. 16 samples (four replicates of root and shoot non-inoculated and inoculated by *K. radicincitans*) were moved forward for hybridization at Second Genome, Inc. (<http://www.secondgenome.com/>). For each sample, amplified products were concentrated using a solid-phase reversible immobilization method for the purification of PCR products and quantified by electrophoresis using an Agilent 2100 Bioanalyzer®. PhyloChip Control Mix™ was added to each amplified product. Bacterial 16S rRNA gene amplicons were fragmented, biotin labeled, and hybridized to the PhyloChip™ Array, version G3. PhyloChip arrays were washed, stained, and scanned using a GeneArray® scanner (Affymetrix). Each scan was captured using standard Affymetrix software (GeneChip® Microarray Analysis Suite). From each of the purified PCR products, 500 ng were

fragmented and hybridized. Assuming an average GC content of 54% (based Greengenes database of 16S rRNA genes) and an amplicon length of 1,465 bp,  $3.3 \times 10^{11}$  (330 billion) molecules were assayed from each sample. Second Genome's PhyloChip processing software, Sinfonietta, executes a multistage analysis (Probst et al., 2014).

## References

- Bloemberg, G.V., Wijfjes, A.H., Lamers, G.E., Stuurman, N., and Lugtenberg, B.J. (2000) Simultaneous imaging of *Pseudomonas fluorescens* WCS365 populations expressing three different autofluorescent proteins in the rhizosphere: new perspectives for studying microbial communities. *Mol Plant Microbe Interact* **13**: 1170-1176.
- Fankem H, Tchuisseu TGV, Ngo NL, Nguessou NG, Nwaga D & Etoa F-X (2014) Maize (*Zea mays*) growth promotion by rock-phosphate solubilising bacteria isolated from nutrient deficient soils of Cameroon. *African Journal of Microbiology Research* **8**: 3570-3579.
- Gentleman, R.C., Carey, V.J., Bates, D.M., Bolstad, B., Dettling, M., Dudoit, S. et al. (2004) Bioconductor: open software development for computational biology and bioinformatics. *Genome Biol* **5**: R80.
- Gerhardt, P., Murray, R., Krieg, N.R., and Wood, W.A. (1994) *Methods for general and molecular bacteriology*. Washington, DC: ASM Press.
- Gonzales, M.F., Brooks, T., Pukatzki, S.U., and Provenzano, D. (2013) Rapid protocol for preparation of electrocompetent *Escherichia coli* and *Vibrio cholerae*. *J Vis Exp* **80**: 50684.
- Koboldt, D.C., Zhang, Q., Larson, D.E., Shen, D., McLellan, M.D., Lin, L. et al. (2012) VarScan2: somatic mutation and copy number alteration discovery in cancer by exome sequencing. *Genome Res* **22**: 568-576.
- Legendijk, E.L., Validov, S., Lamers, G.E., de Weert, S., and Bloemberg, G.V. (2010) Genetic tools for tagging Gram-negative bacteria with mCherry for visualization in vitro and in natural habitats, biofilm and pathogenicity studies. *FEMS Microbiol Lett* **305**: 81-90.
- Li, H., and Durbin, R. (2009) Fast and accurate short read alignment with Burrows-Wheeler transform. *Bioinformatics* **25**: 1754-1760.
- Nautiyal CS (1999) An efficient microbiological growth medium for screening phosphate solubilizing microorganisms. *FEMS Microbiol Lett* **170**: 265-270.
- Probst, A.J., Birarda, G., Holman, H.Y., DeSantis, T.Z., Wanner, G., Andersen, G.L. et al. (2014) Coupling genetic and chemical microbiome profiling reveals heterogeneity of archaeome and bacteriome in subsurface biofilms that are dominated by the same archaeal species. *PLoS One* **9**: e99801.
- Ruppel, S., Ruhlmann, J., and Merbach, W. (2006) Quantification and localization of bacteria in plant tissues using quantitative real-time PCR and online emission fingerprinting. *Plant Soil* **286**: 21-35.
- Seemann, T. (2014) Prokka: rapid prokaryotic genome annotation. *Bioinformatics* **30**: 2068-2069.
